# Supplementary material for: Competitive binding of STATs to receptor phospho-Tyr motifs accounts for altered cytokine responses
Source: eLife journal article supplement (doi:10.7554/elife.66014), 2021-04-19

Figure 4-figure supplement 2

a)

Downregulated phospho-sites

Upregulated phospho-sites

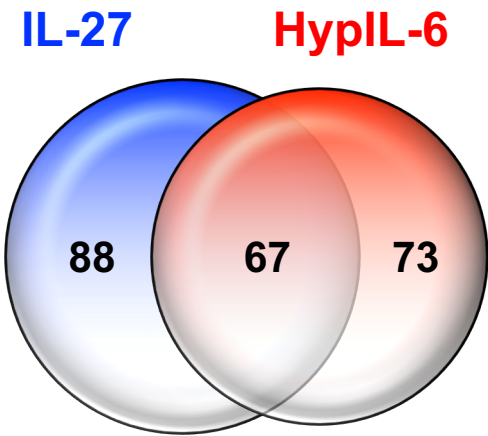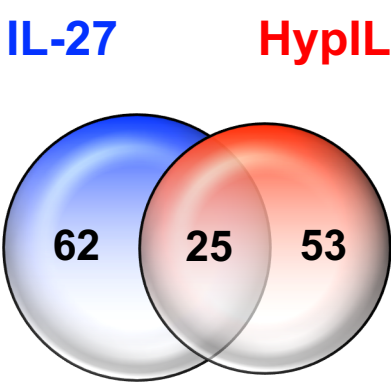

b)

IL-27

HypIL-6

| peptide           | Fold change<br>/ log <sub>2</sub> | peptide            | Fold change<br>/ log <sub>2</sub> |
|-------------------|-----------------------------------|--------------------|-----------------------------------|
| CHD12 S144        | -6.33                             | LGALSL S4          | 9.05                              |
| MAP1B S2271       | -3.66                             | RNASE9 S53 T54     | 5.73                              |
| ZNF280C S183 T185 | -3.16                             | AHNAK S41 T38      | 4.00                              |
| ADGRF2 T601 Y588  | -3.11                             | BAD S25            | 3.99                              |
| ZC2HC1A S223      | -2.39                             | CLK3 S157          | 3.74                              |
| BOLA1 S81         | -2.30                             | STAT4 Y693         | 3.67                              |
| GTF2I S103        | -2.25                             | DCP1B S283         | 3.47                              |
| TACC1 S689 Y695   | -2.17                             | STAT3 Y705         | 2.81                              |
| SCAF11 S776       | -2.08                             | STAT1 Y701         | 2.63                              |
| ABCC1 S915        | -1.97                             | STAT5A/B Y694/Y699 | 2.18                              |
| WRNIP1 S151       | -1.95                             | PTPN11 Y546        | 1.93                              |
| SEC23IP S737      | -1.92                             | BAD S134           | 1.84                              |
| RBM15B S109       | -1.81                             | ARL6IP4 S239       | 1.78                              |
| MECP2 S25         | -1.65                             | UBR5 S1549         | 1.77                              |
| PSMD11 S14        | -1.63                             | PIEZO1 S1646       | 1.70                              |
| OSPBL8 S68        | -1.40                             | PPM1G T122         | 1.69                              |

| peptide           | Fold change<br>/ log <sub>2</sub> | peptide       | Fold change<br>/ log <sub>2</sub> |
|-------------------|-----------------------------------|---------------|-----------------------------------|
| TACC1 S689 Y695   | -4.88                             | LGALSL S4     | 6.49                              |
| CDH12 S144        | -4.16                             | STAT4 Y693    | 5.74                              |
| MAP1B S2271       | -4.01                             | MYO9B S1261   | 4.34                              |
| ZNF280C S183 T185 | -3.42                             | ANKRD36C T828 | 4.30                              |
| ADGFR2 T601 Y588  | -3.37                             | CDCA7L S261   | 3.54                              |
| ZC2HC1A S223      | -2.46                             | STAT3 Y705    | 3.40                              |
| BOLA1 S81         | -2.44                             | NELFA S233    | 2.92                              |
| WRNIP1 S151       | -2.40                             | PPM1G T122    | 2.90                              |
| FAM47E T158 Y161  | -2.17                             | BAD S25       | 2.84                              |
| SCAF11 S776       | -2.15                             | NDRG1 S336    | 2.79                              |
| ABCC1 S915        | -2.07                             | STAT1 Y701    | 2.69                              |
| NUDT19 S4         | -1.97                             | SUGP2 S573    | 2.18                              |
| GTF2I S103        | -1.85                             | PRR12 S44     | 1.98                              |
| ZC3H3 S408        | -1.69                             | STAT3 S727    | 1.97                              |
| SEC23IP S737      | -1.64                             | PTPN11 Y546   | 1.73                              |
| PSMD11 S14        | -1.60                             | RCHY1 S257    | 1.72                              |

c)

Cellular location

UP keywords

d)

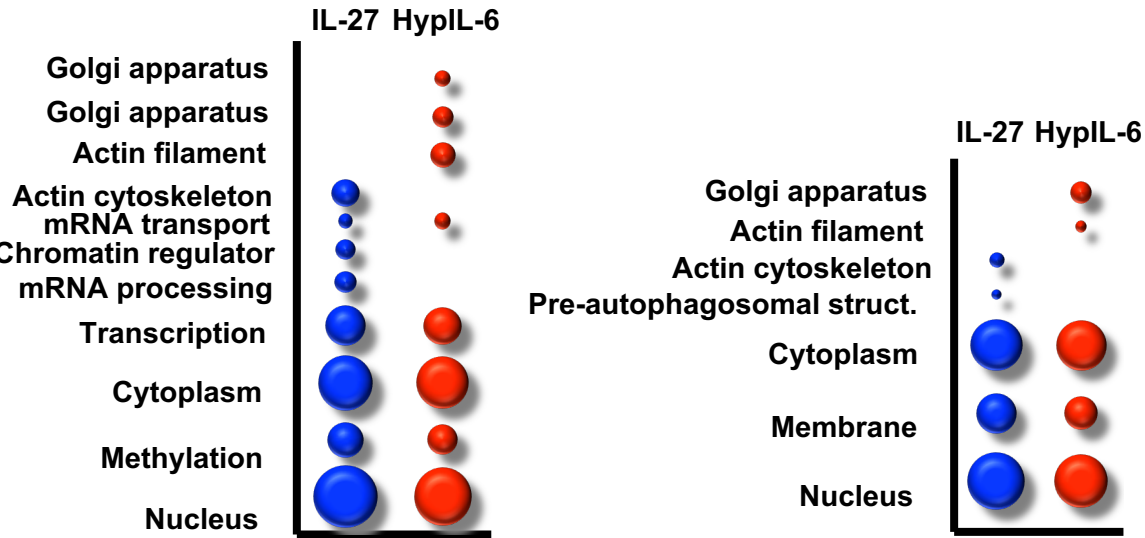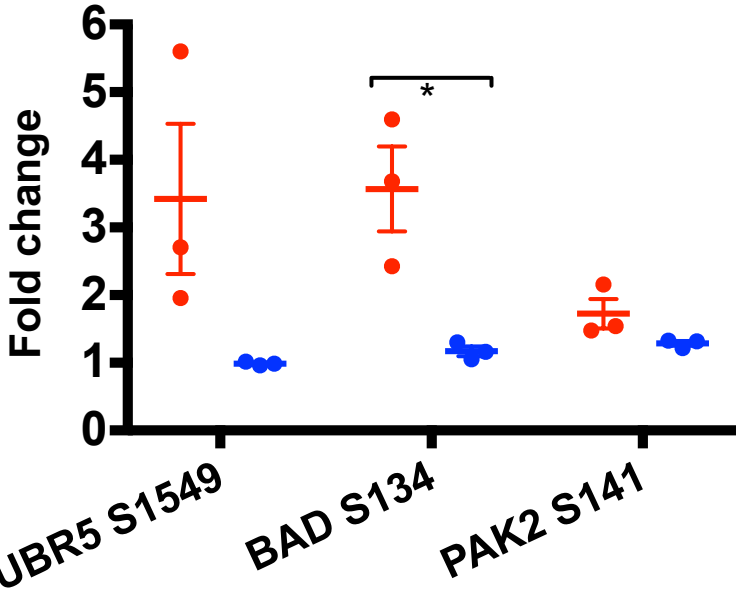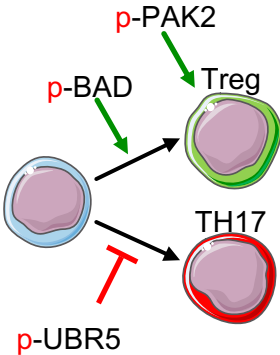

Supplement: supp [file elife-66014-supp-v1.zip]
