# Supplementary material for: Competitive binding of STATs to receptor phospho-Tyr motifs accounts for altered cytokine responses
Source: eLife. 2021 Apr 19;10:e66014. doi: 10.7554/eLife.66014 (PMC8099432; doi:10.7554/eLife.66014)
Supplement: Supplementary file 1. [file elife-66014-supp1.docx]

**Supplementary material 1**

Equations (1) – (22) are the ordinary differential equations (ODEs) describing the HypIL-6 signalling pathway, under the assumption of mass action kinetics.

|  | (1) |
| --- | --- |
|  | (2) |
|  | (3) |
|  | (4) |
|  | (5) |
|  | (6) |
|  | (7) |
|  | (8) |
|  | (9) |
|  | (10) |
|  | (11) |
|  | (12) |
|  | (13) |
|  | (14) |
|  | (15) |
|  | (16) |
|  | (17) |
|  | (18) |
|  | (19) |
|  | (20) |
|  | (21) |
|  | (22) |

Equations (23) – (55) are the ordinary differential equations (ODEs) describing the IL-27 signalling pathway, under the assumption of mass action kinetics.

|  | (23) |
| --- | --- |
|  | (24) |
|  | (25) |
|  | (26) |
|  | (27) |
|  | (28) |
|  | (29) |
|  | (30) |
|  | (31) |
|  | (32) |
|  | (33) |
|  | (34) |
|  | (35) |
|  | (36) |
|  | (37) |
|  | (38) |
|  | (39) |
|  | (40) |
|  | (41) |
|  | (42) |
|  | (43) |
|  | (44) |
|  | (45) |
|  | (46) |
|  | (47) |
|  | (48) |
|  | (49) |
|  | (50) |
|  | (51) |
|  | (52) |
|  | (53) |
|  | (54) |
|  | (55) |
