# Supplementary figures and images for: Competitive binding of STATs to receptor phospho-Tyr motifs accounts for altered cytokine responses
Source: eLife journal article supplement (doi:10.7554/elife.66014), 2021-04-19

Figure 3-figure supplement 1

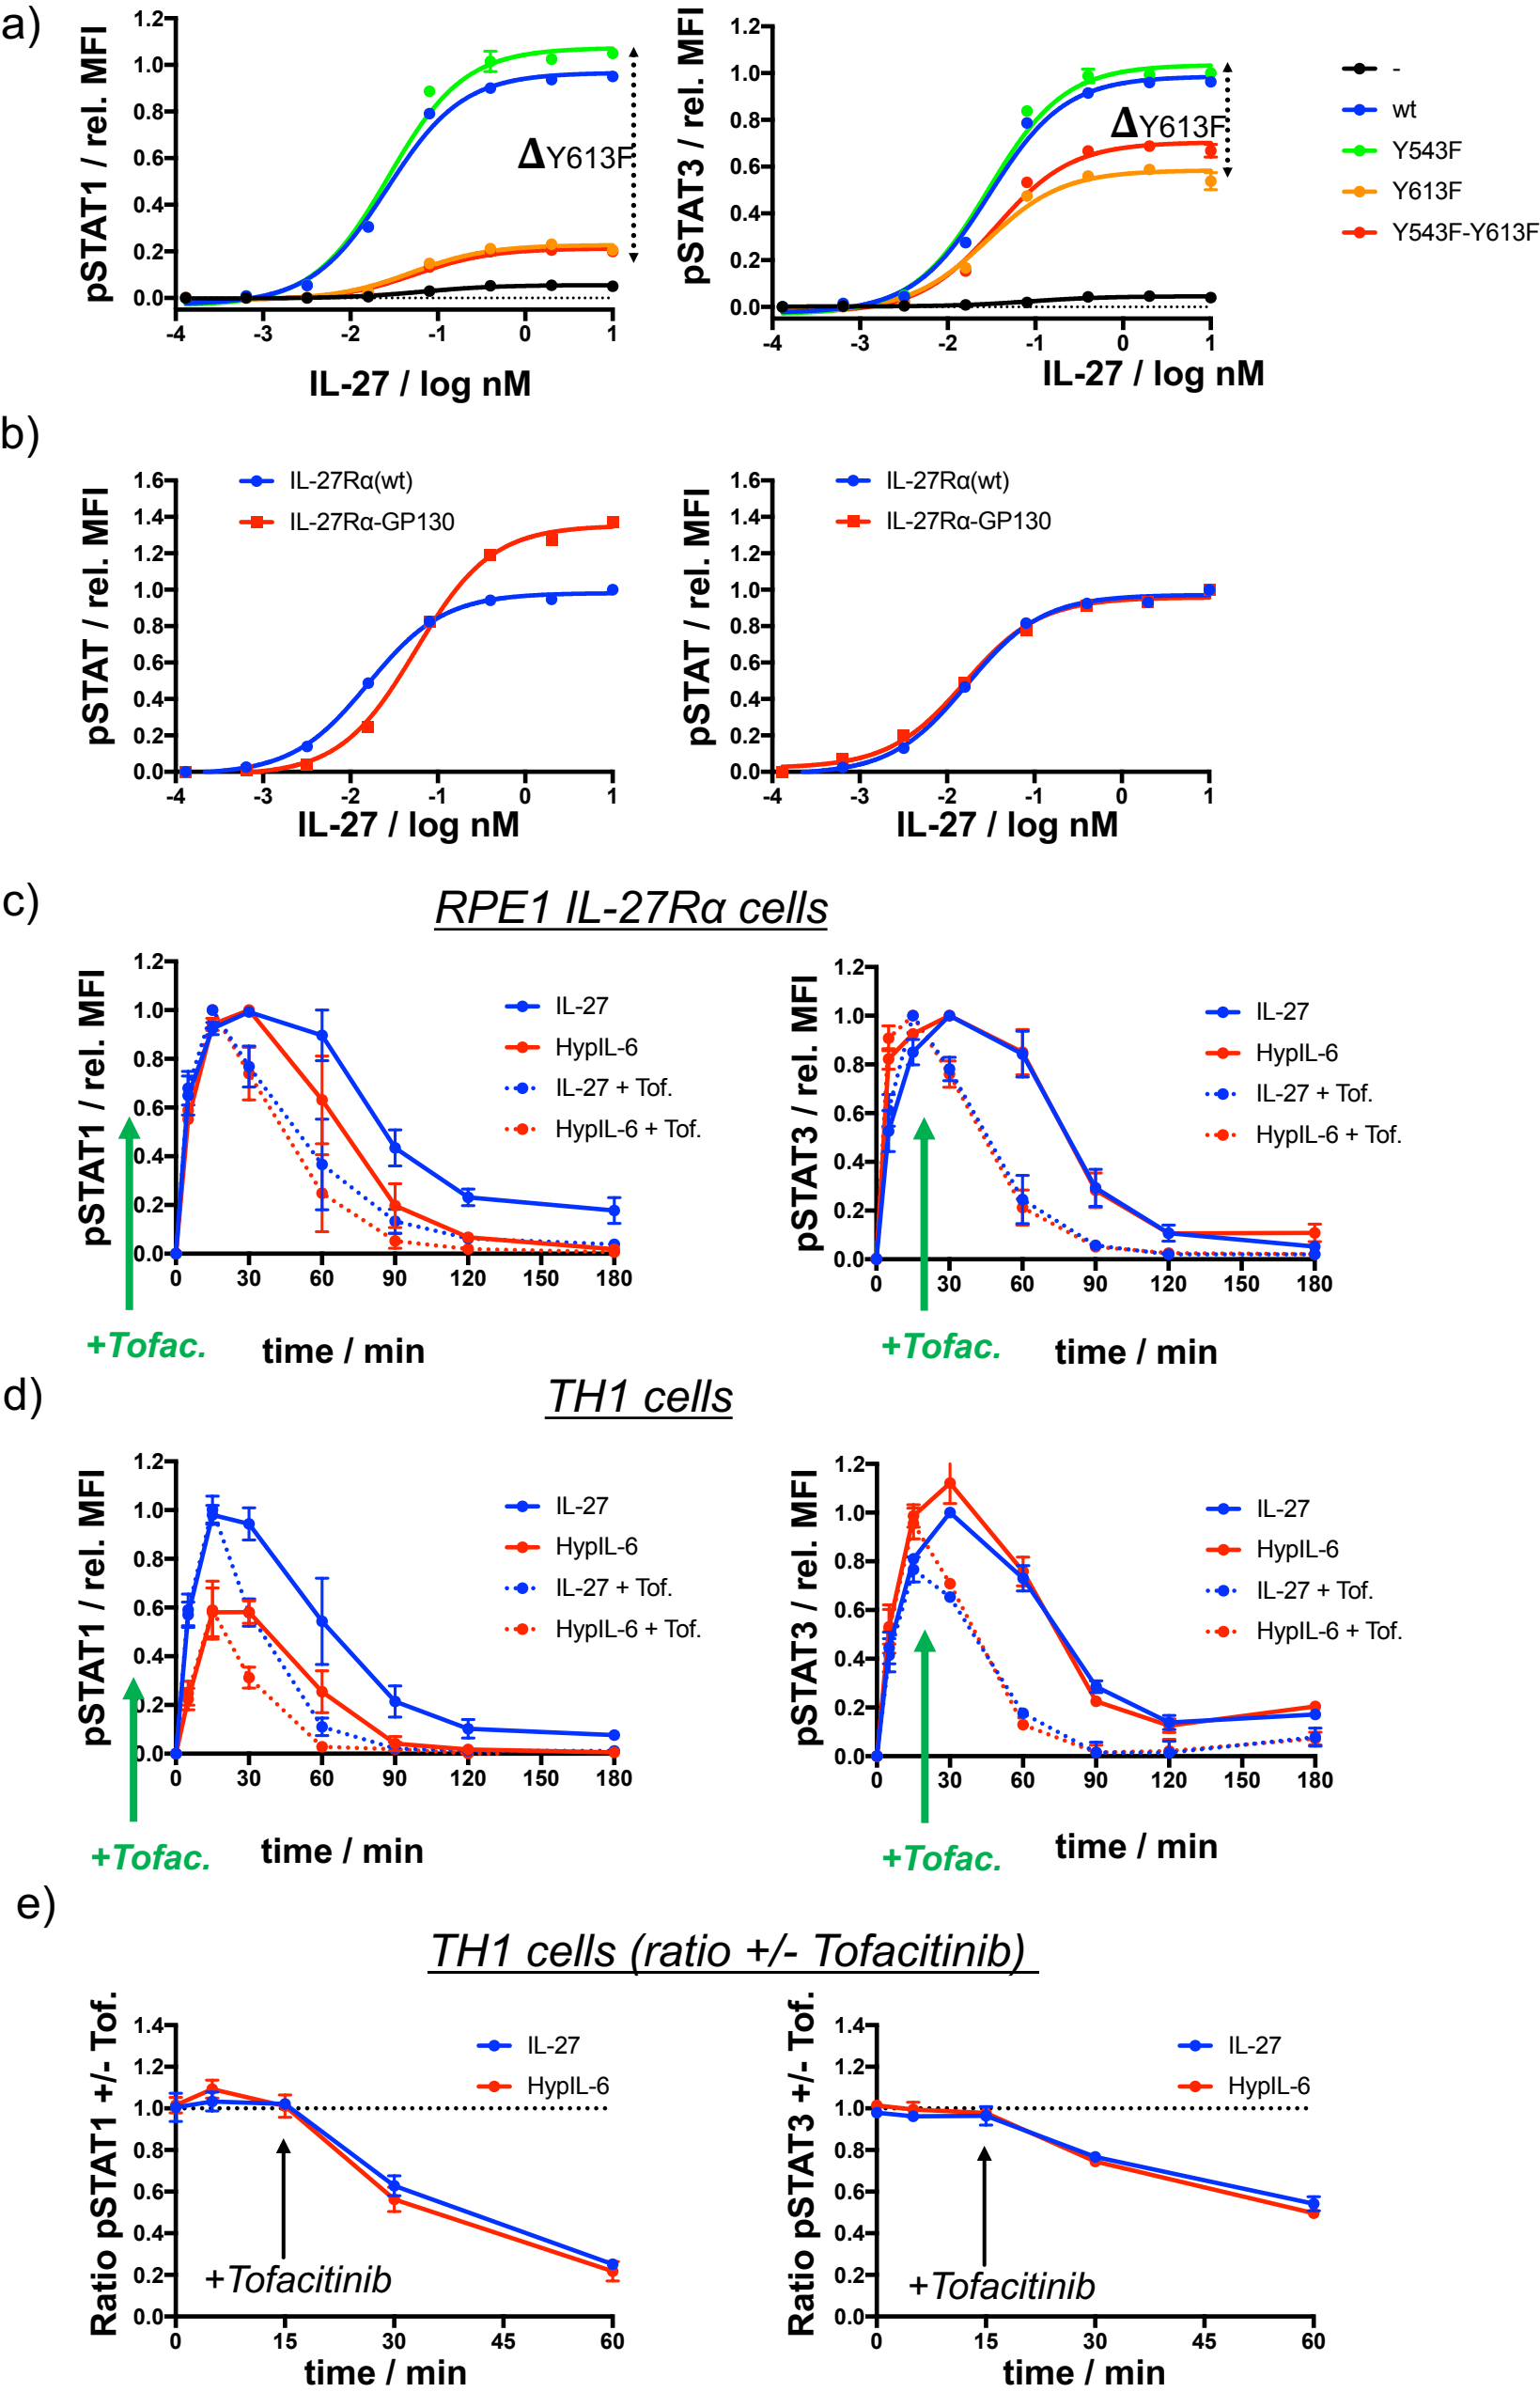

Supplement: supp [file elife-66014-supp-v1.zip]

Figure 1-figure supplement 2

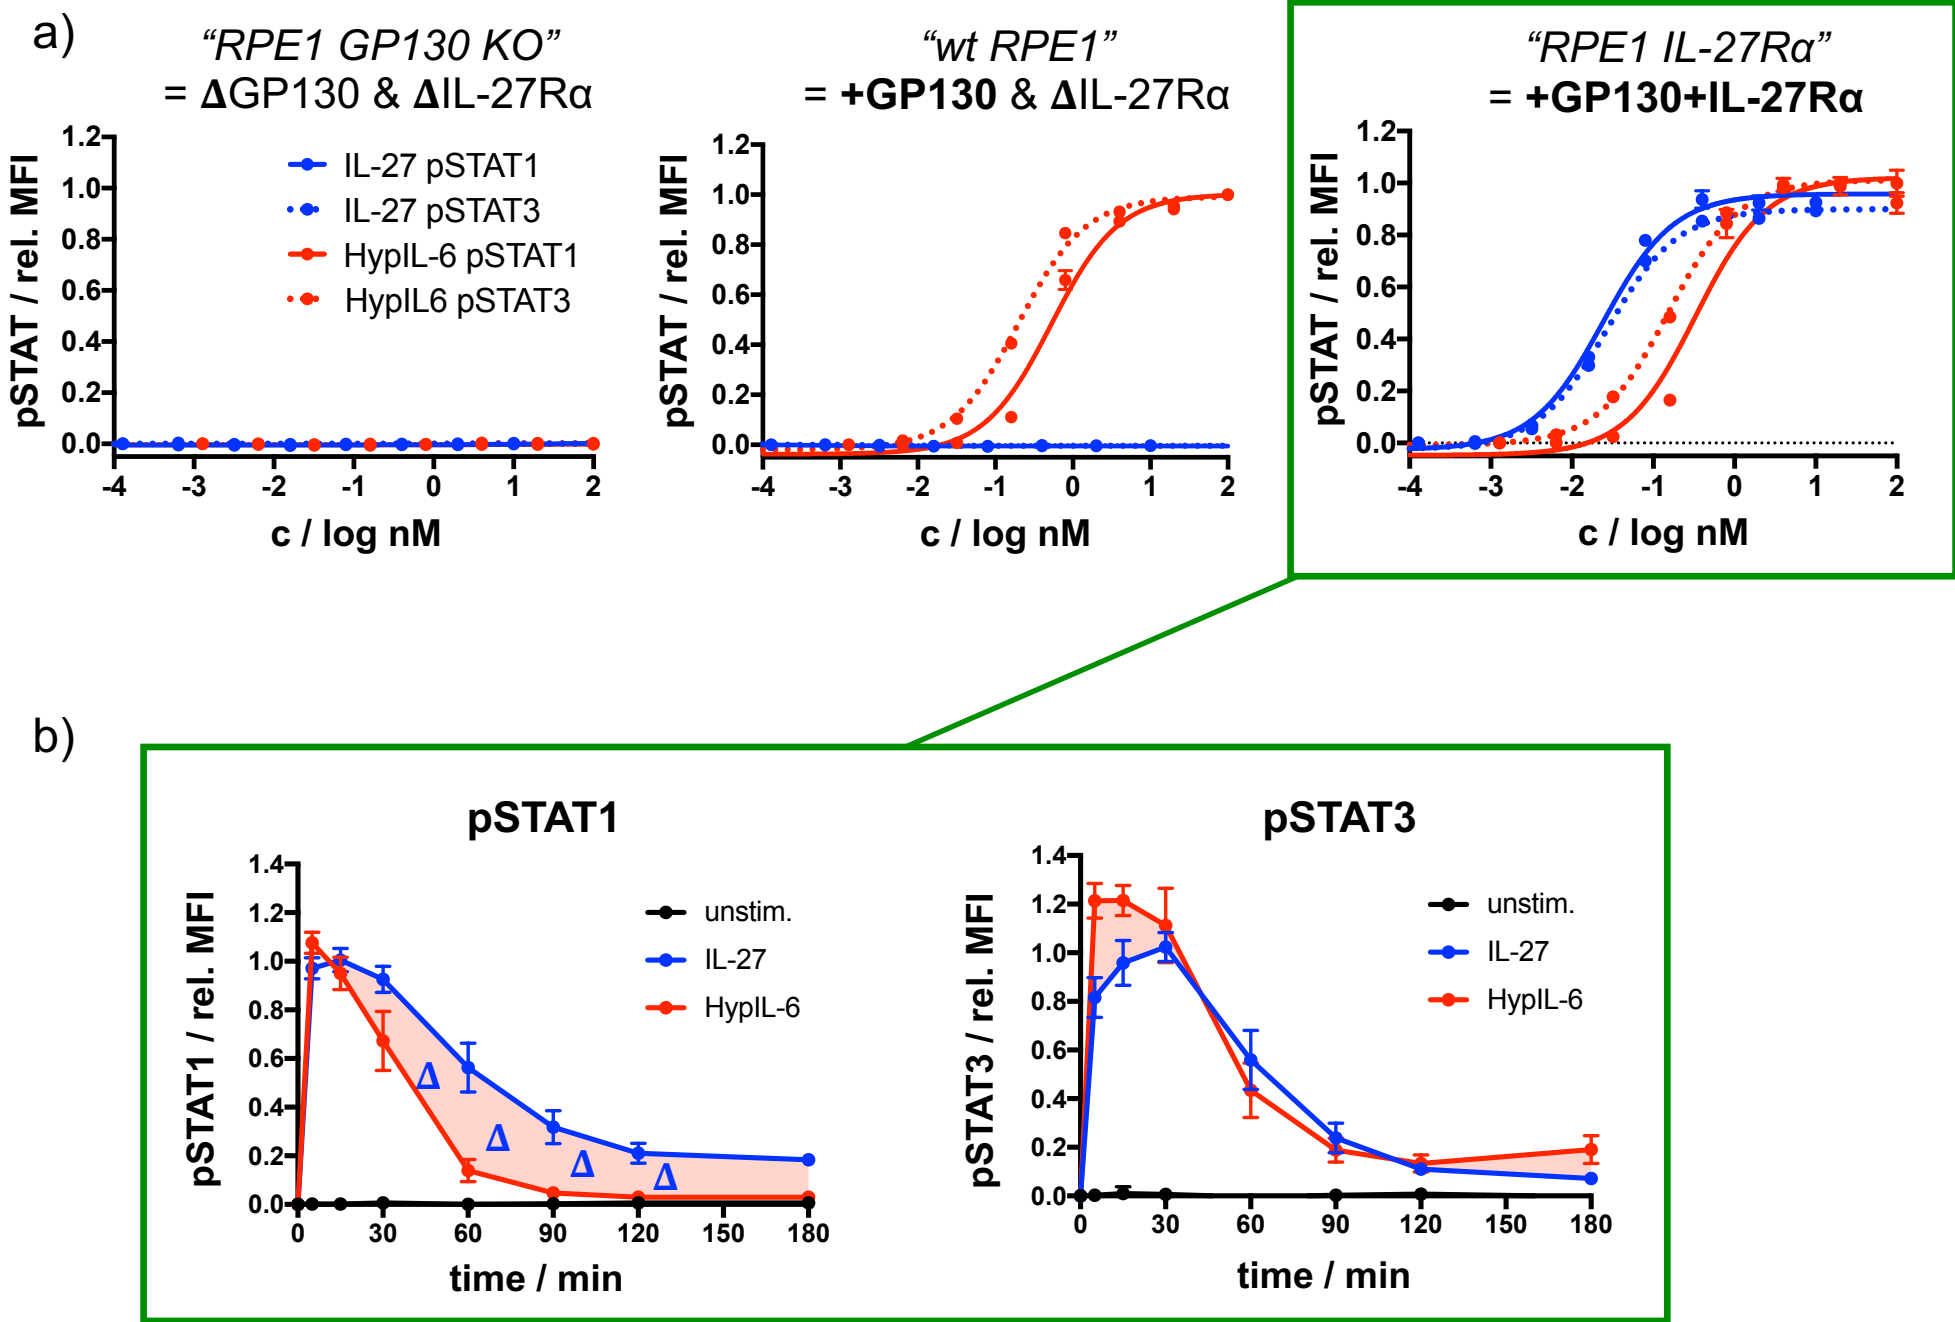

Supplement: supp [file elife-66014-supp-v1.zip]

Figure 7-figure supplement 2

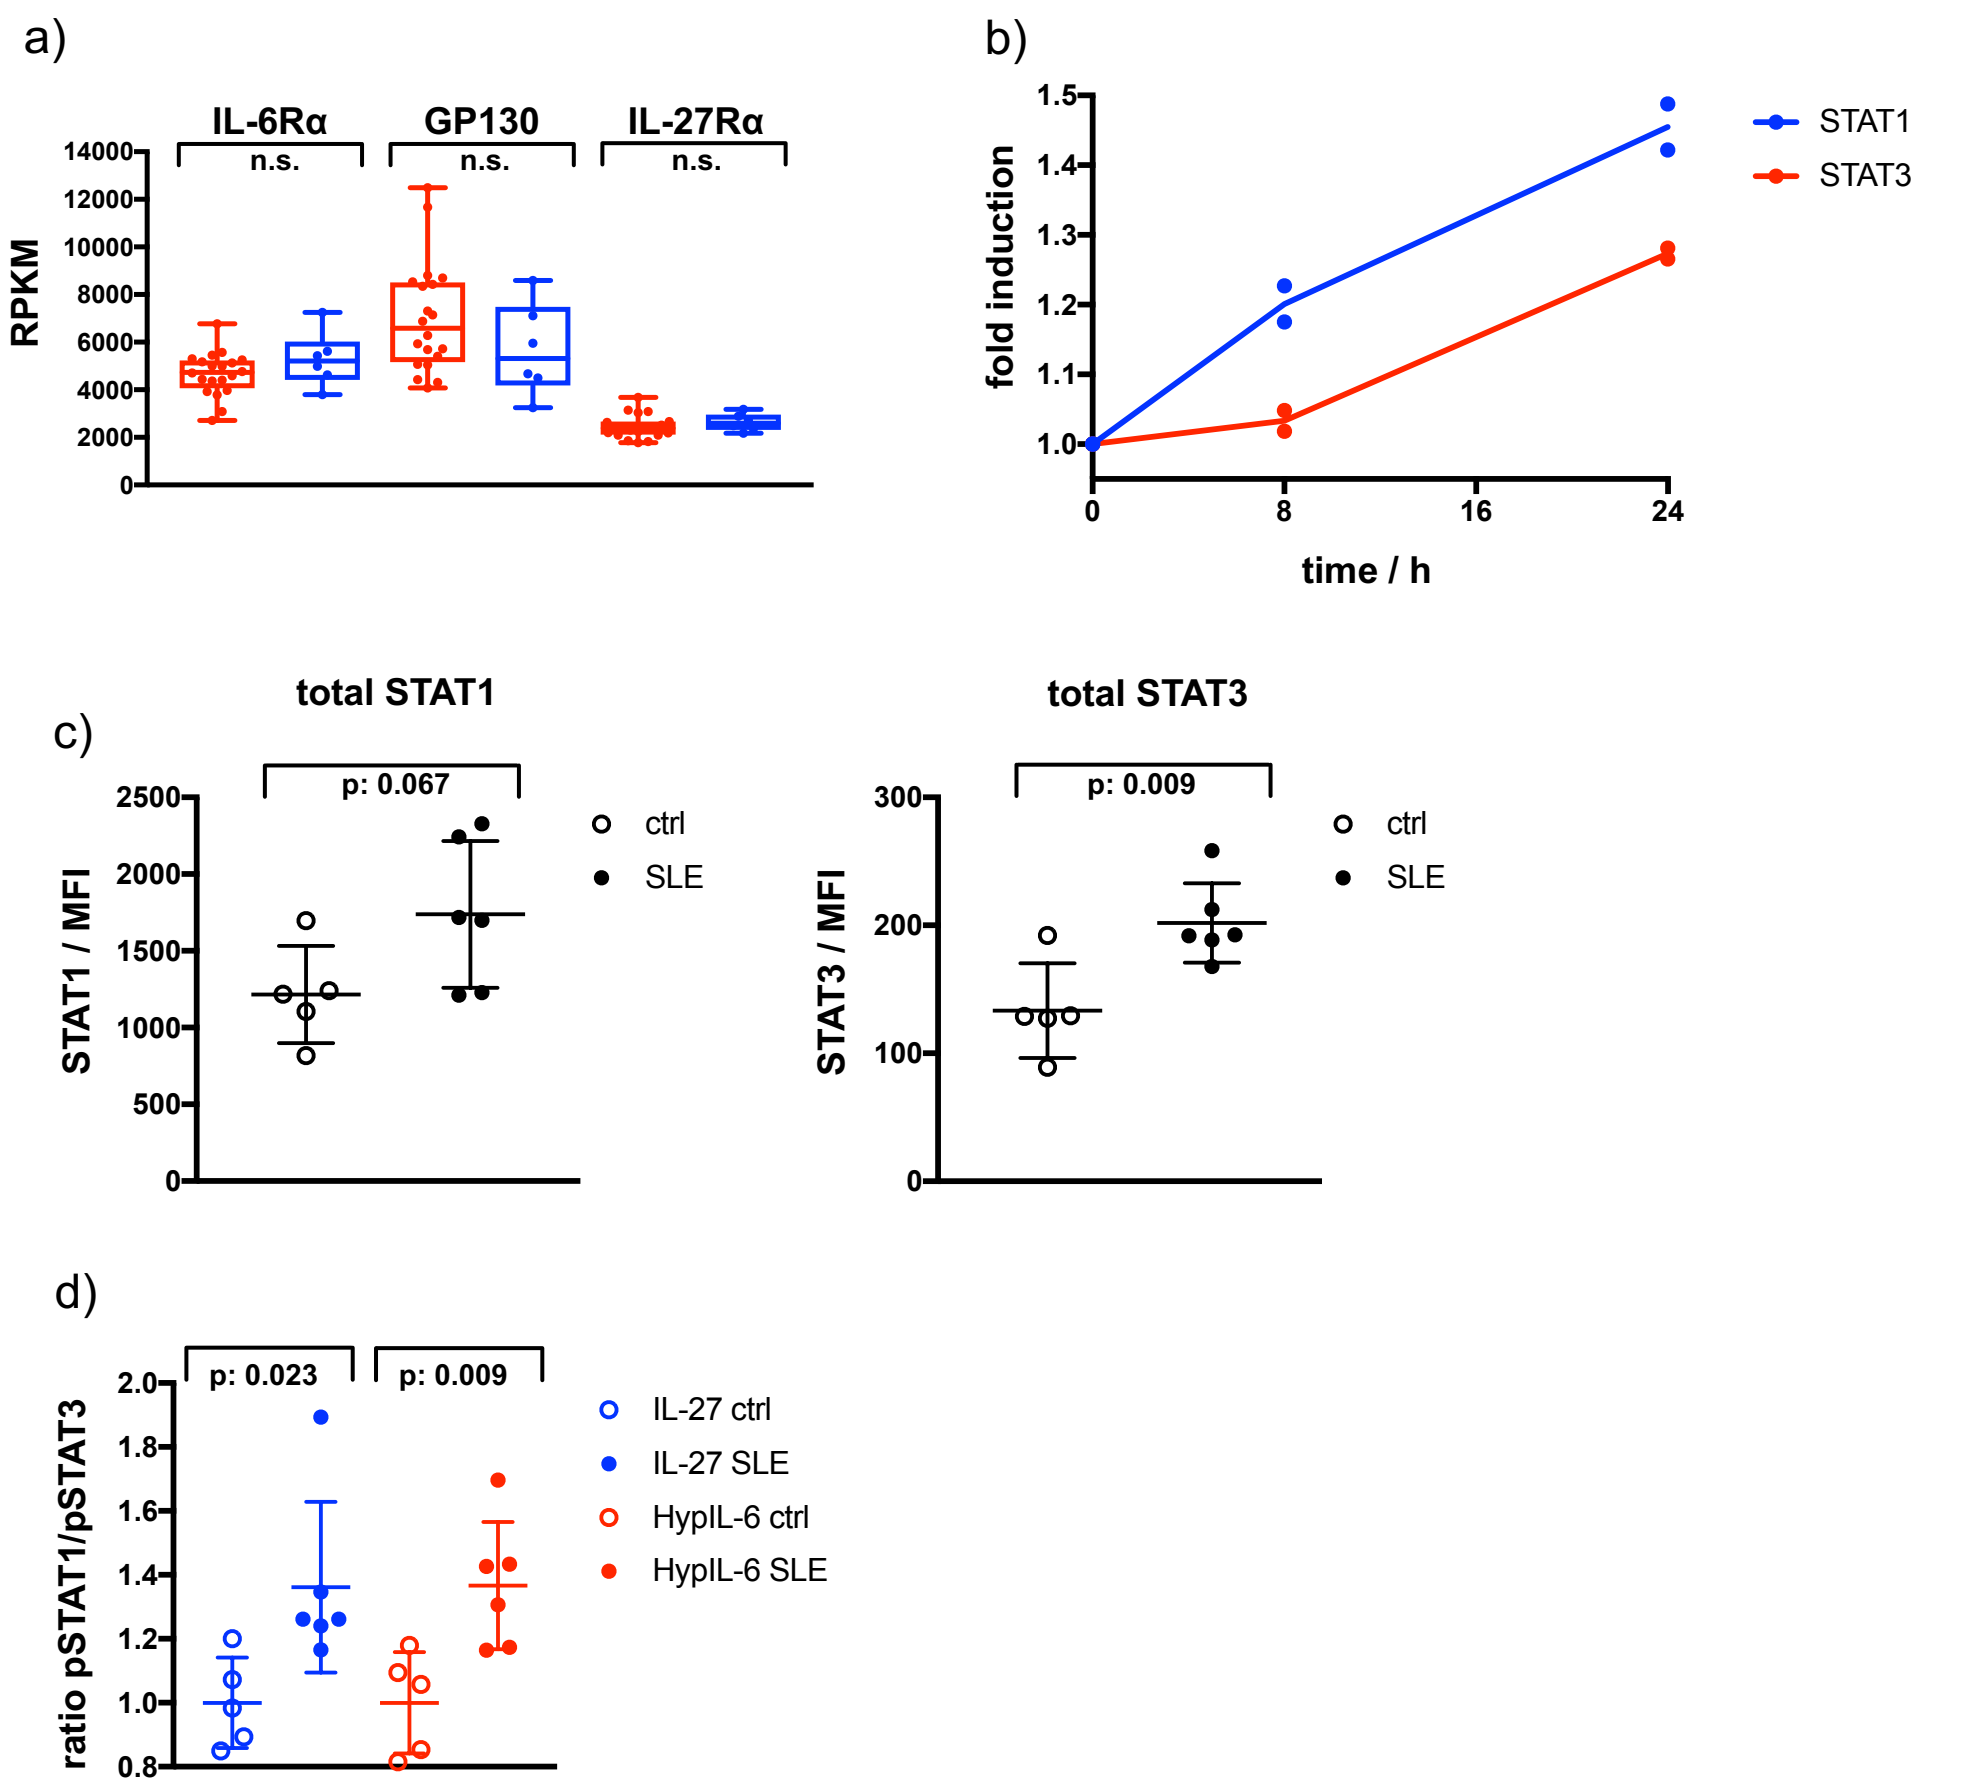

Supplement: supp [file elife-66014-supp-v1.zip]

Figure 6-figure supplement 1

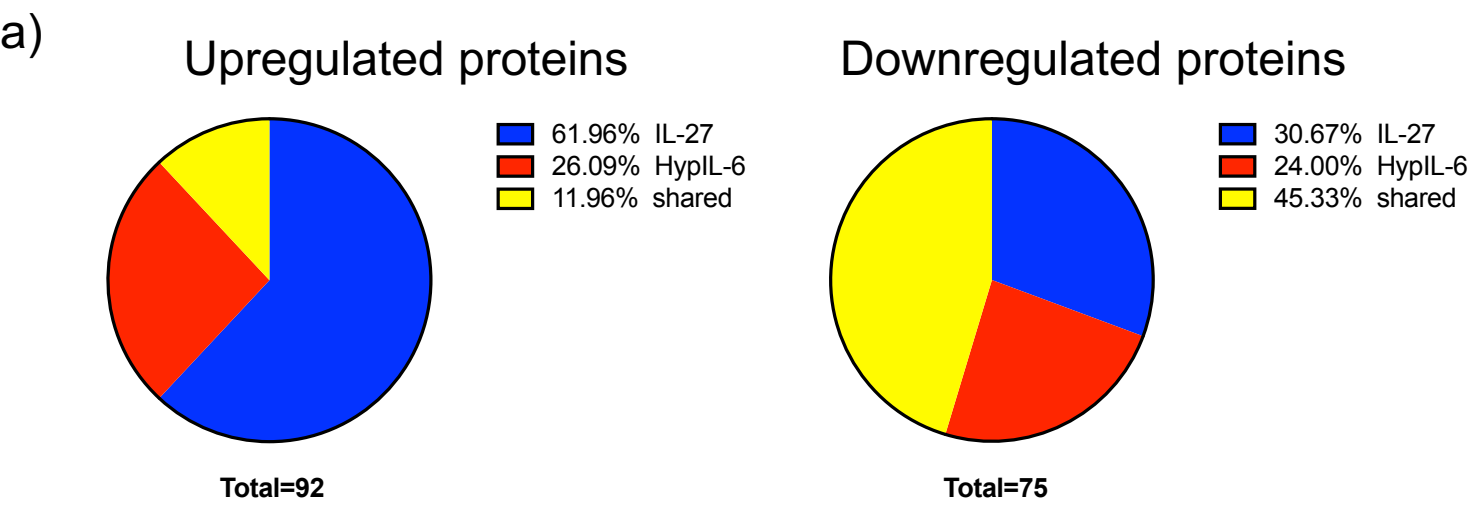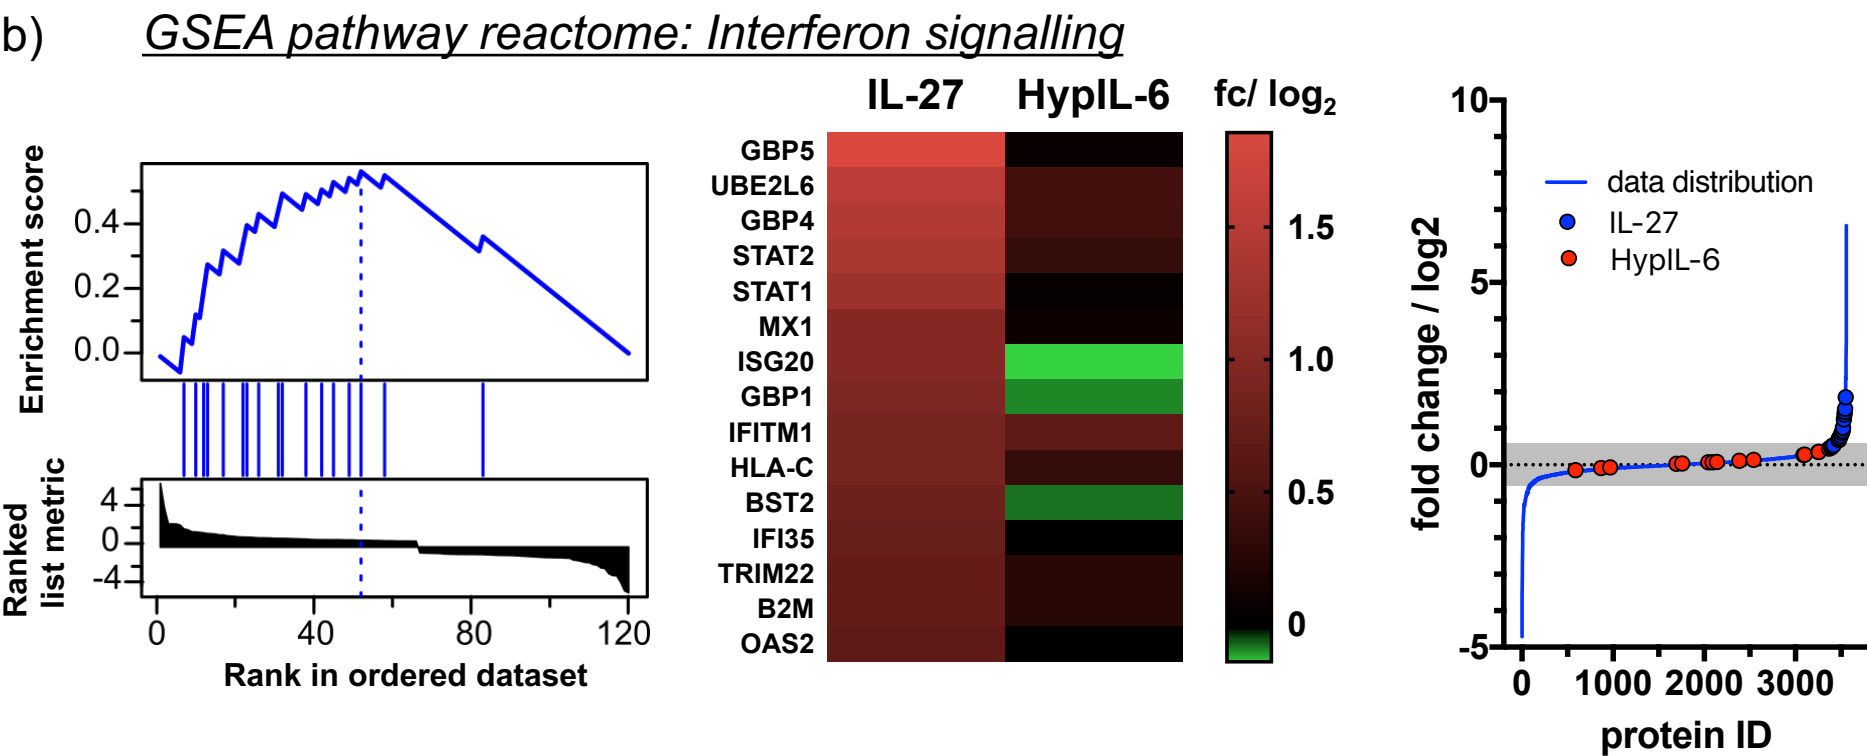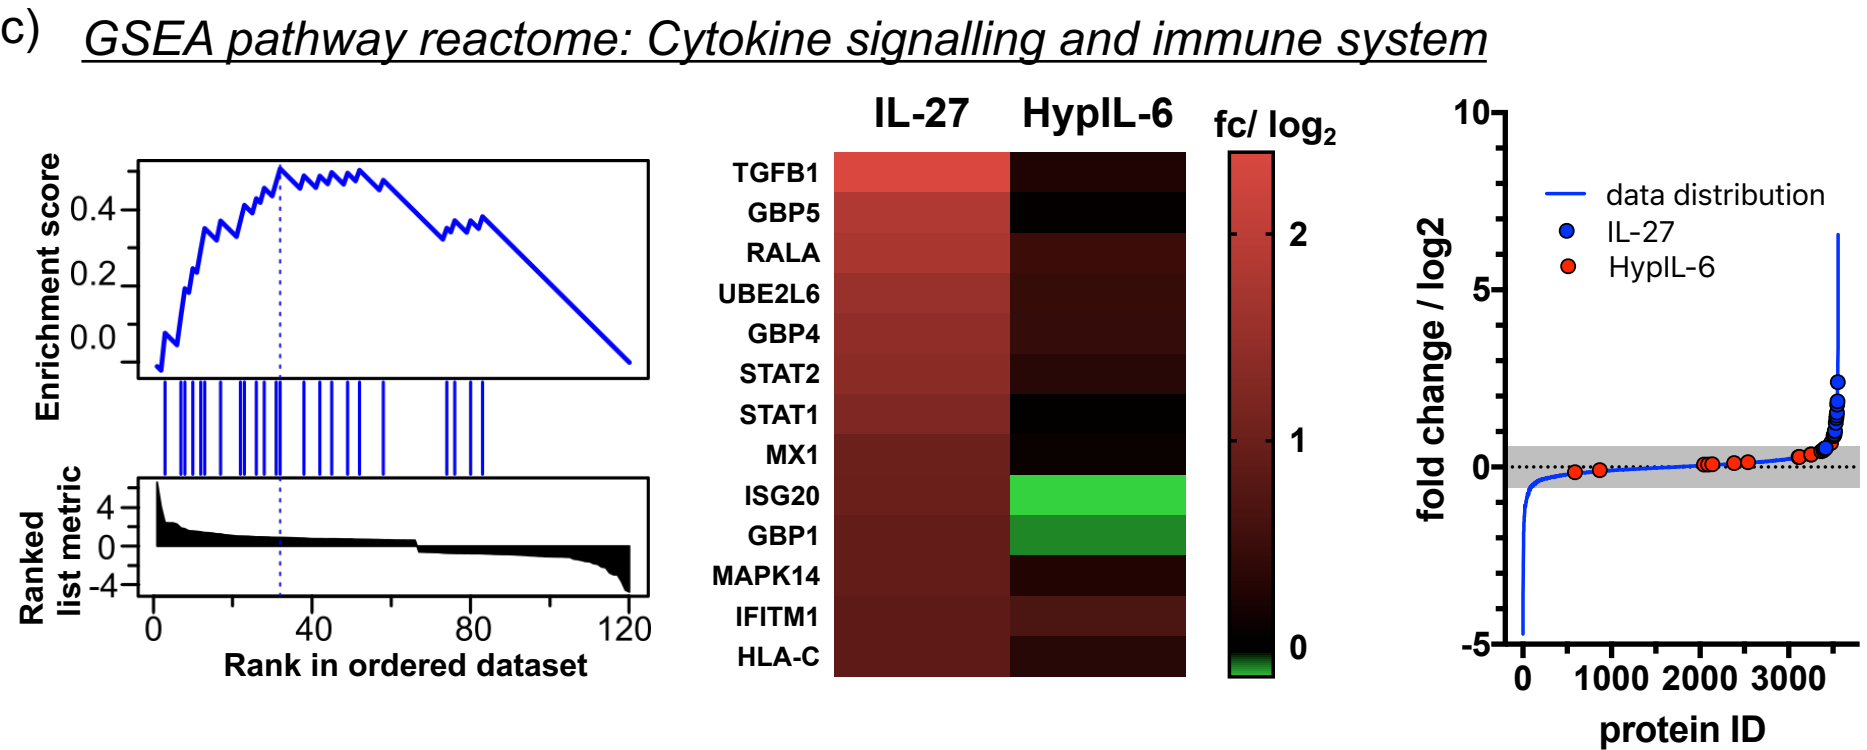

Supplement: supp [file elife-66014-supp-v1.zip]

Figure 5-figure supplement 2

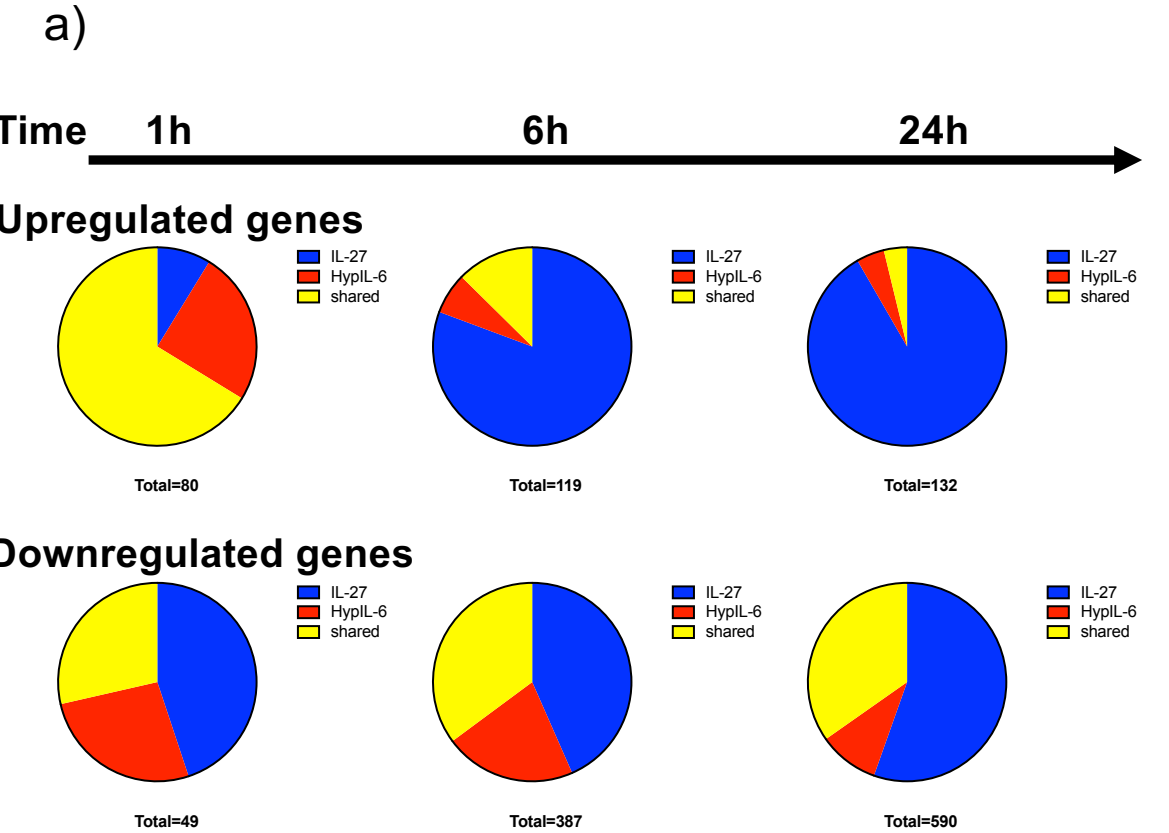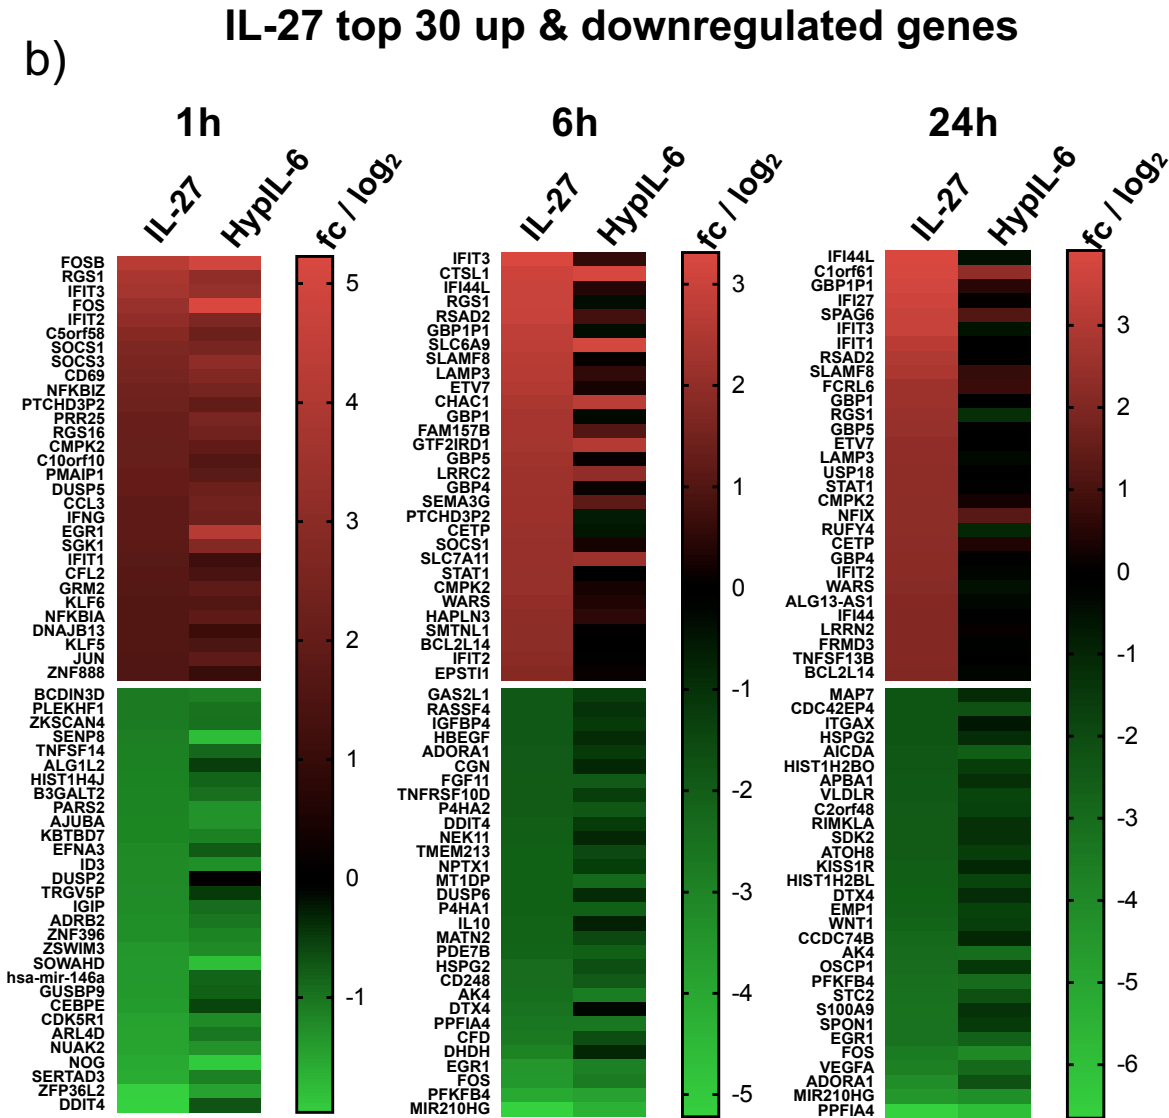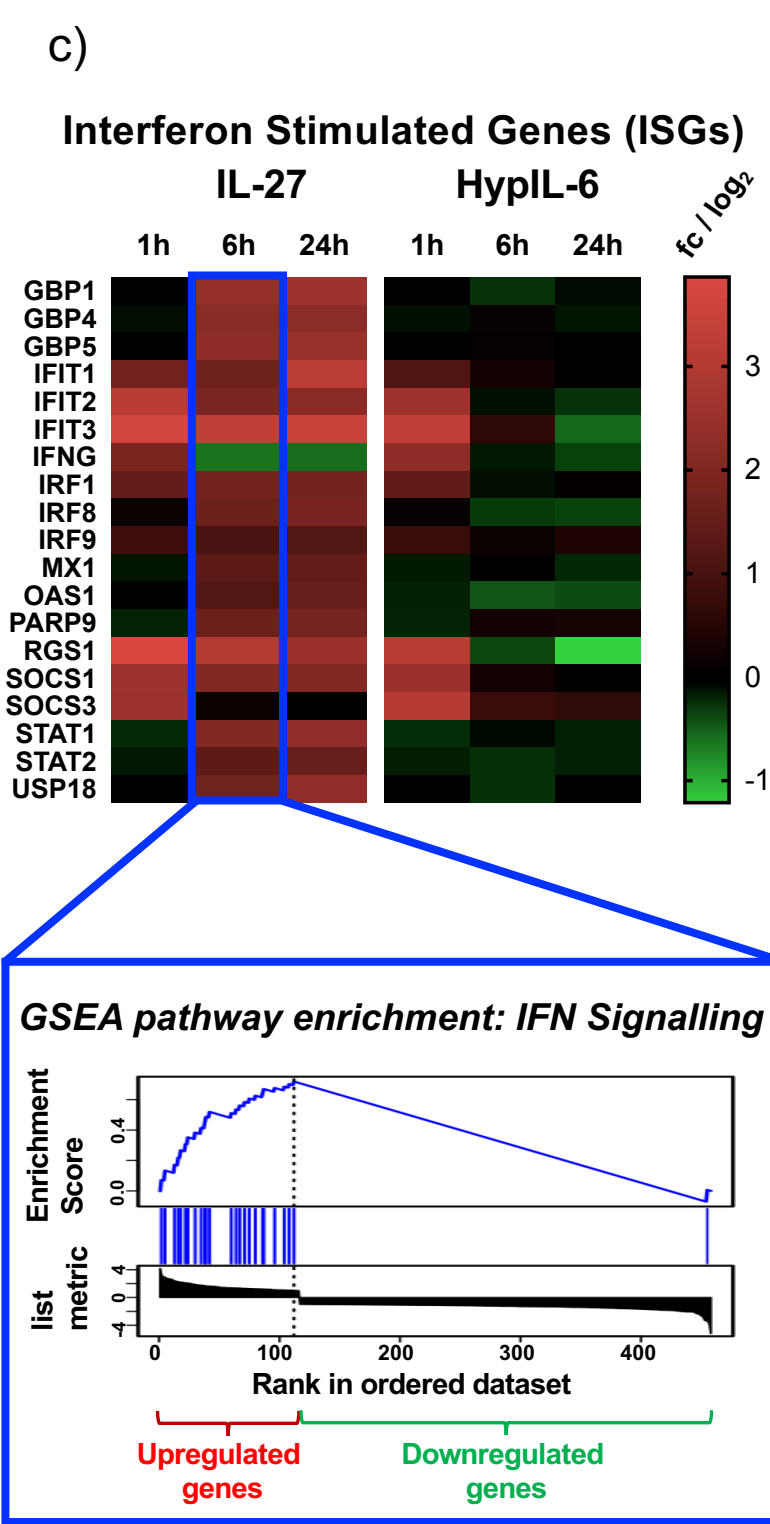

Supplement: supp [file elife-66014-supp-v1.zip]

# Figure 2-figure supplement 1

a)

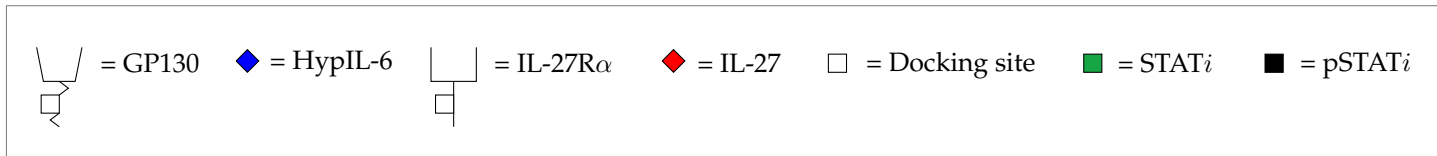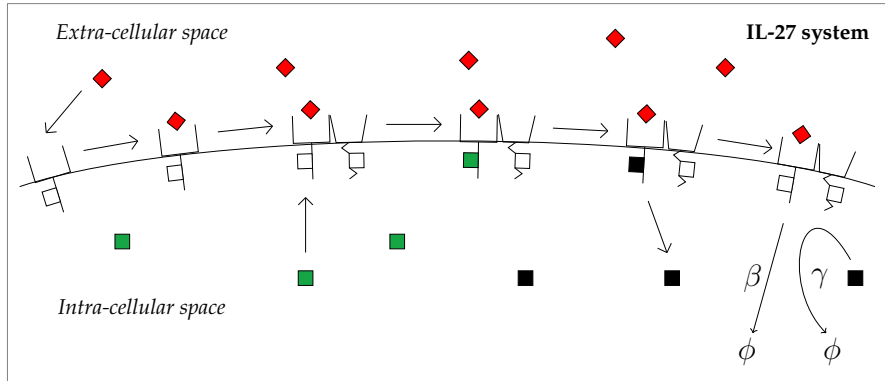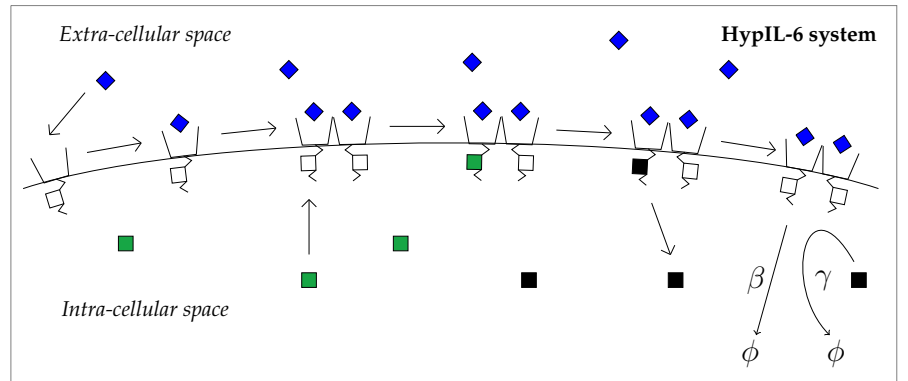

b)

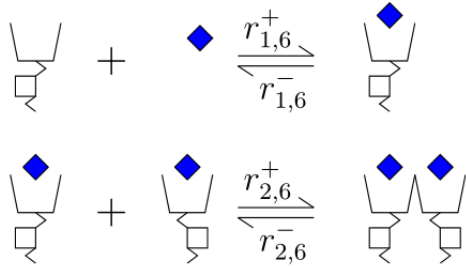

c)

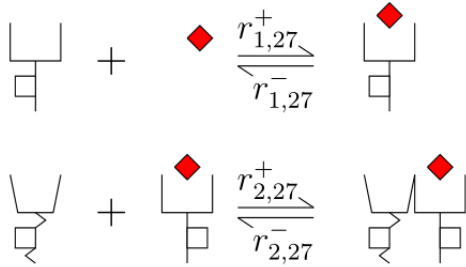

f)

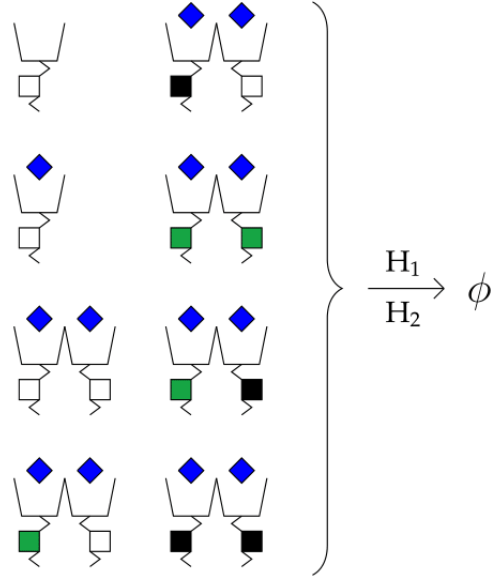

d)

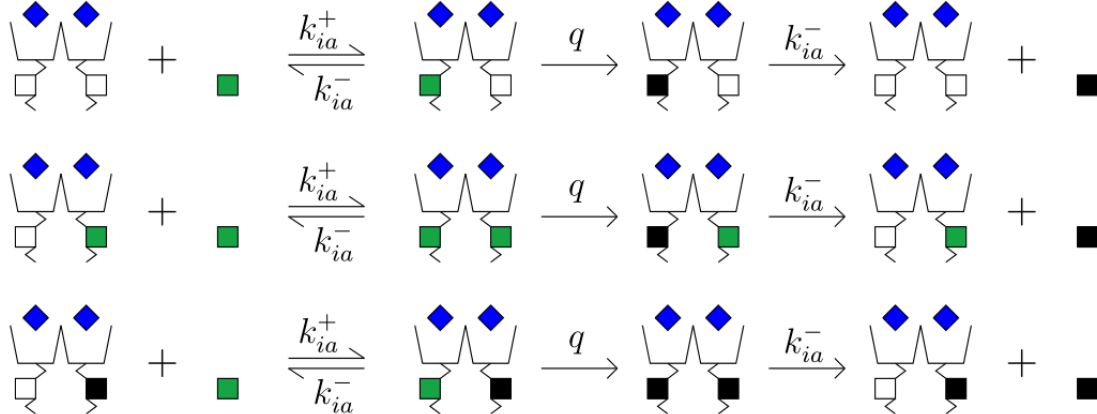

e)

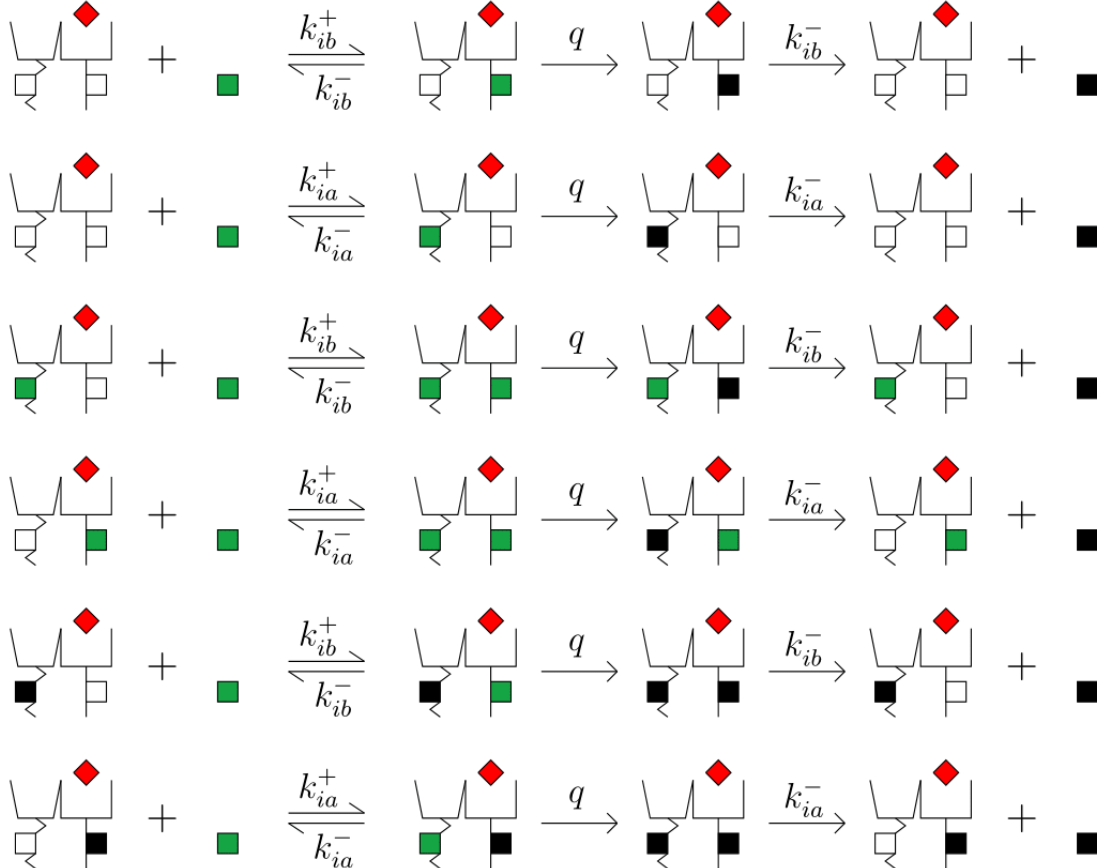

g)

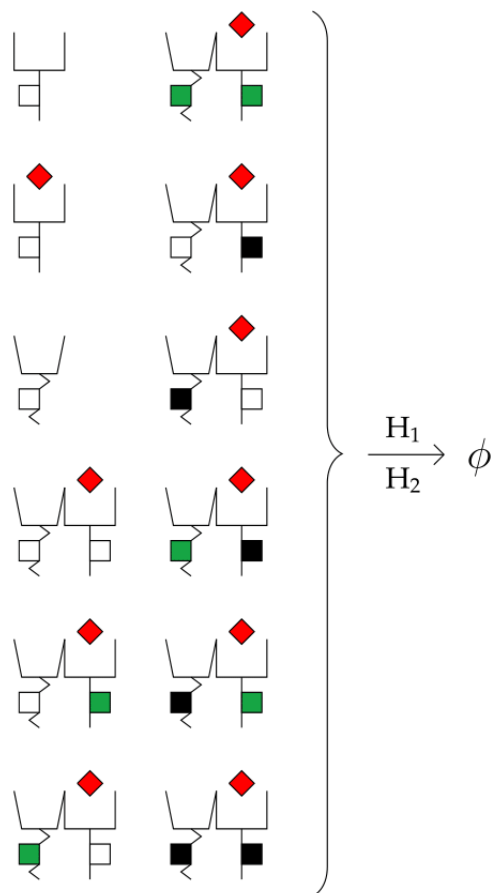

h)

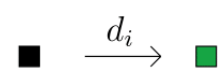

Supplement: supp [file elife-66014-supp-v1.zip]

Figure 4-figure supplement 1

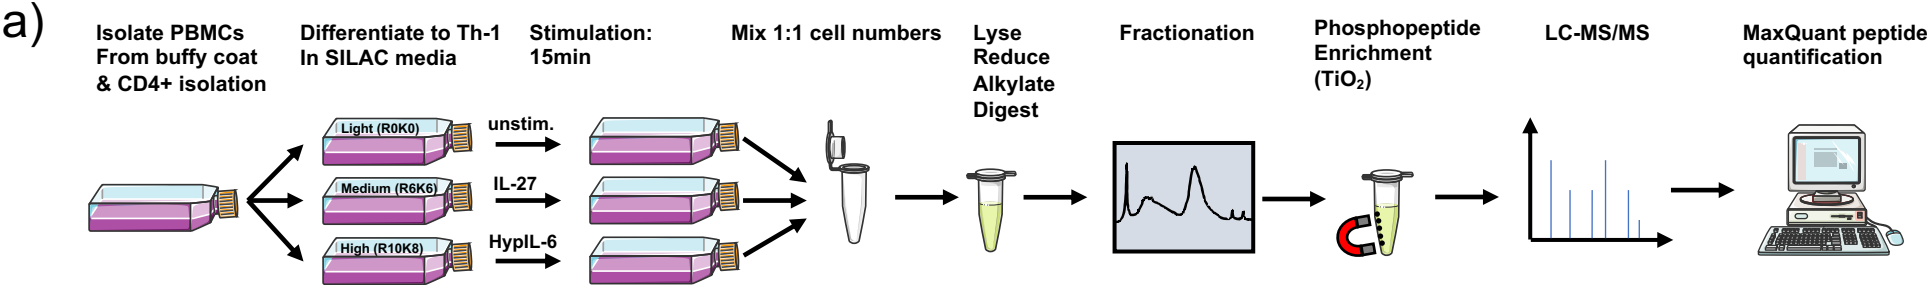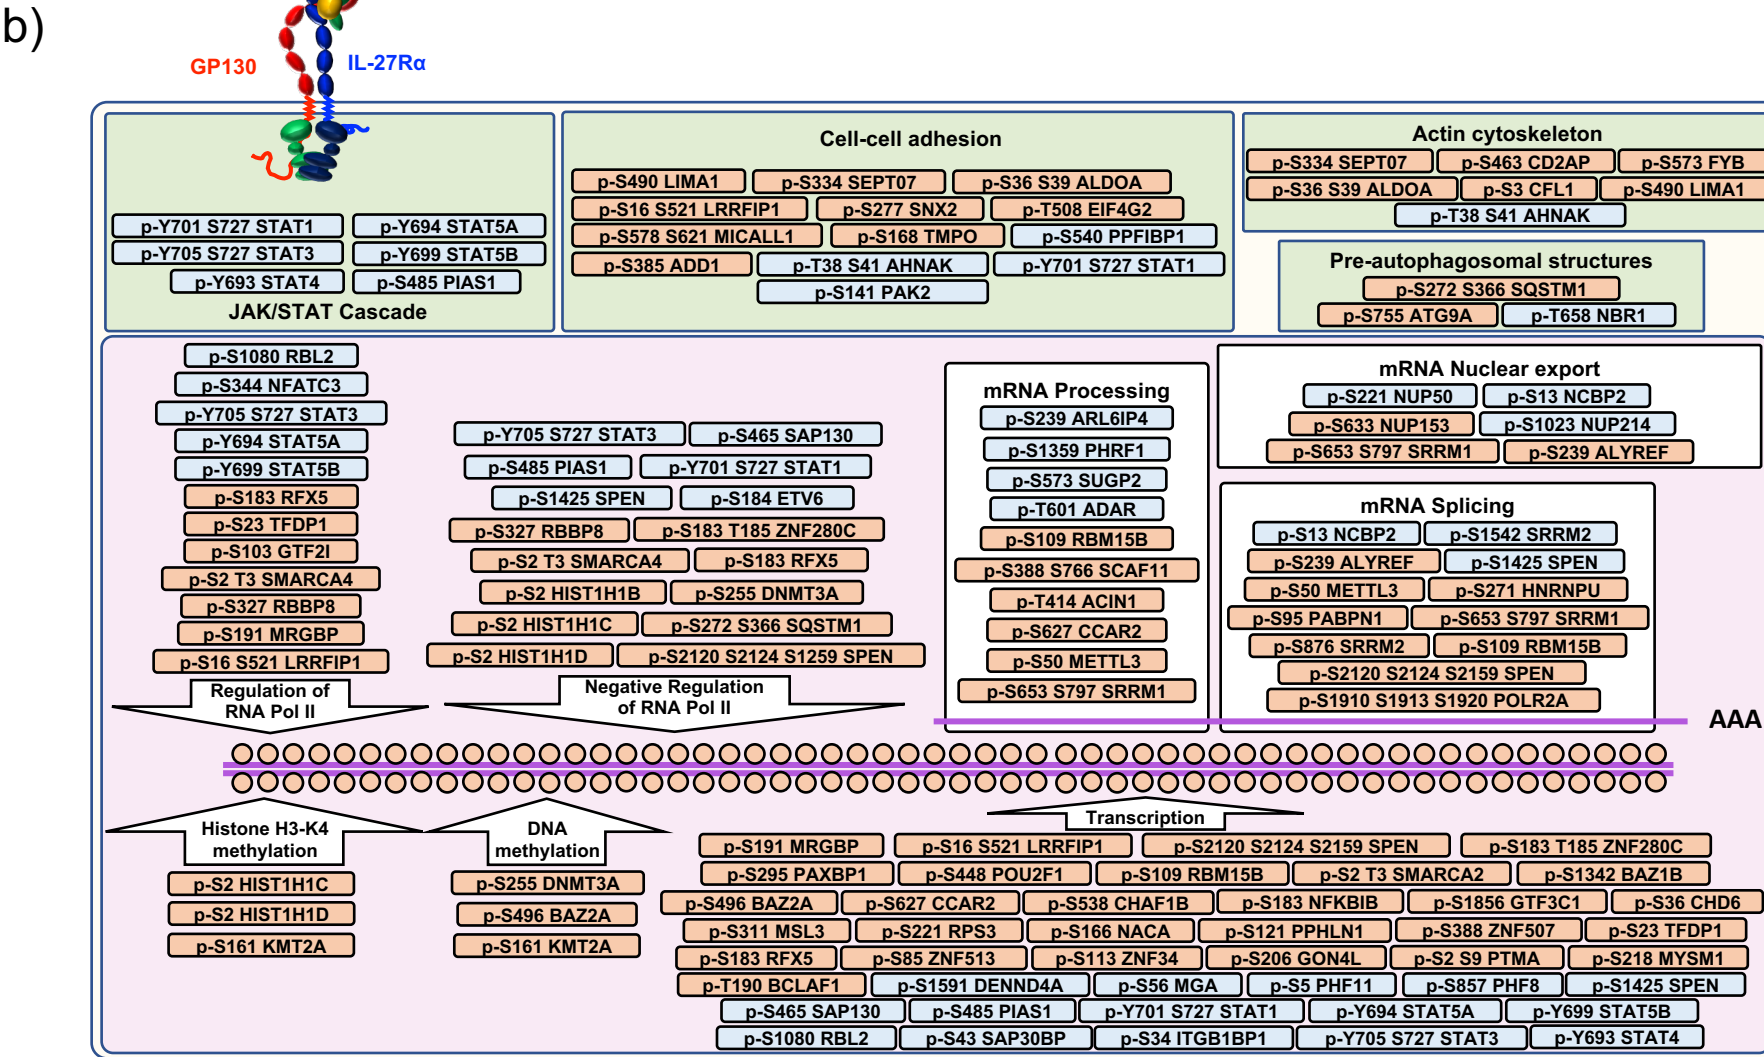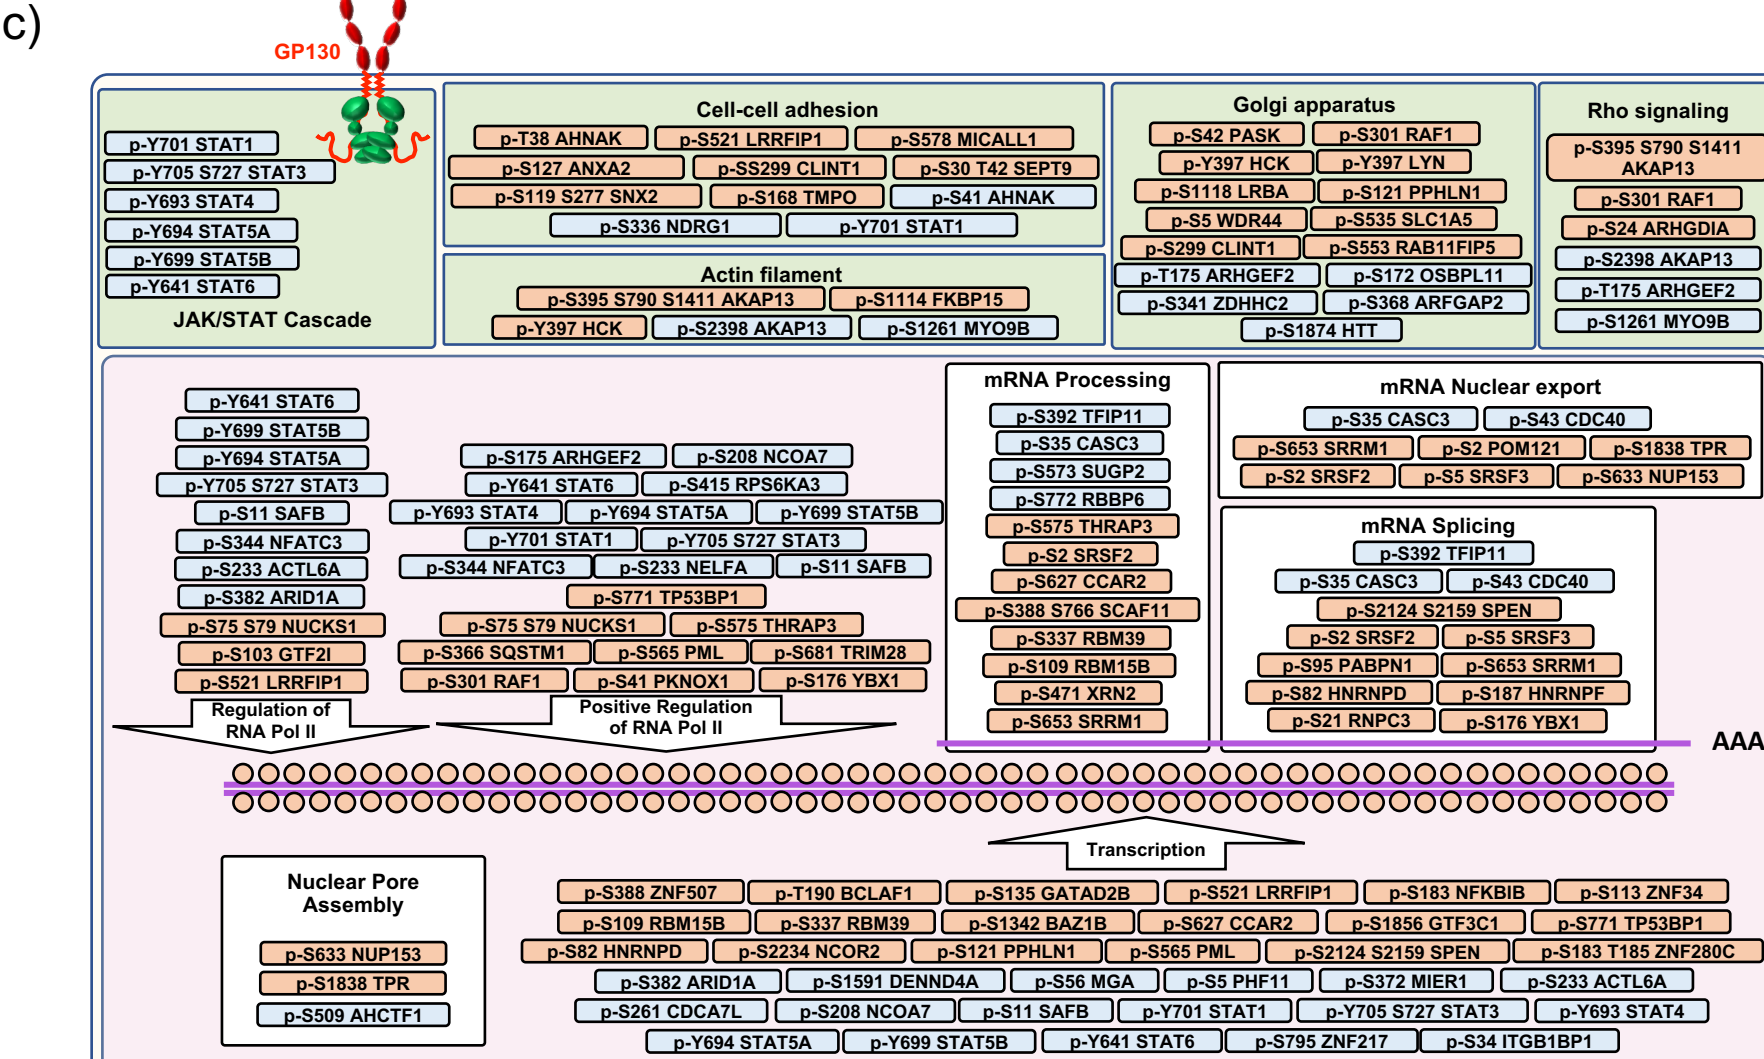

Supplement: supp [file elife-66014-supp-v1.zip]

Figure 7-figure supplement 1

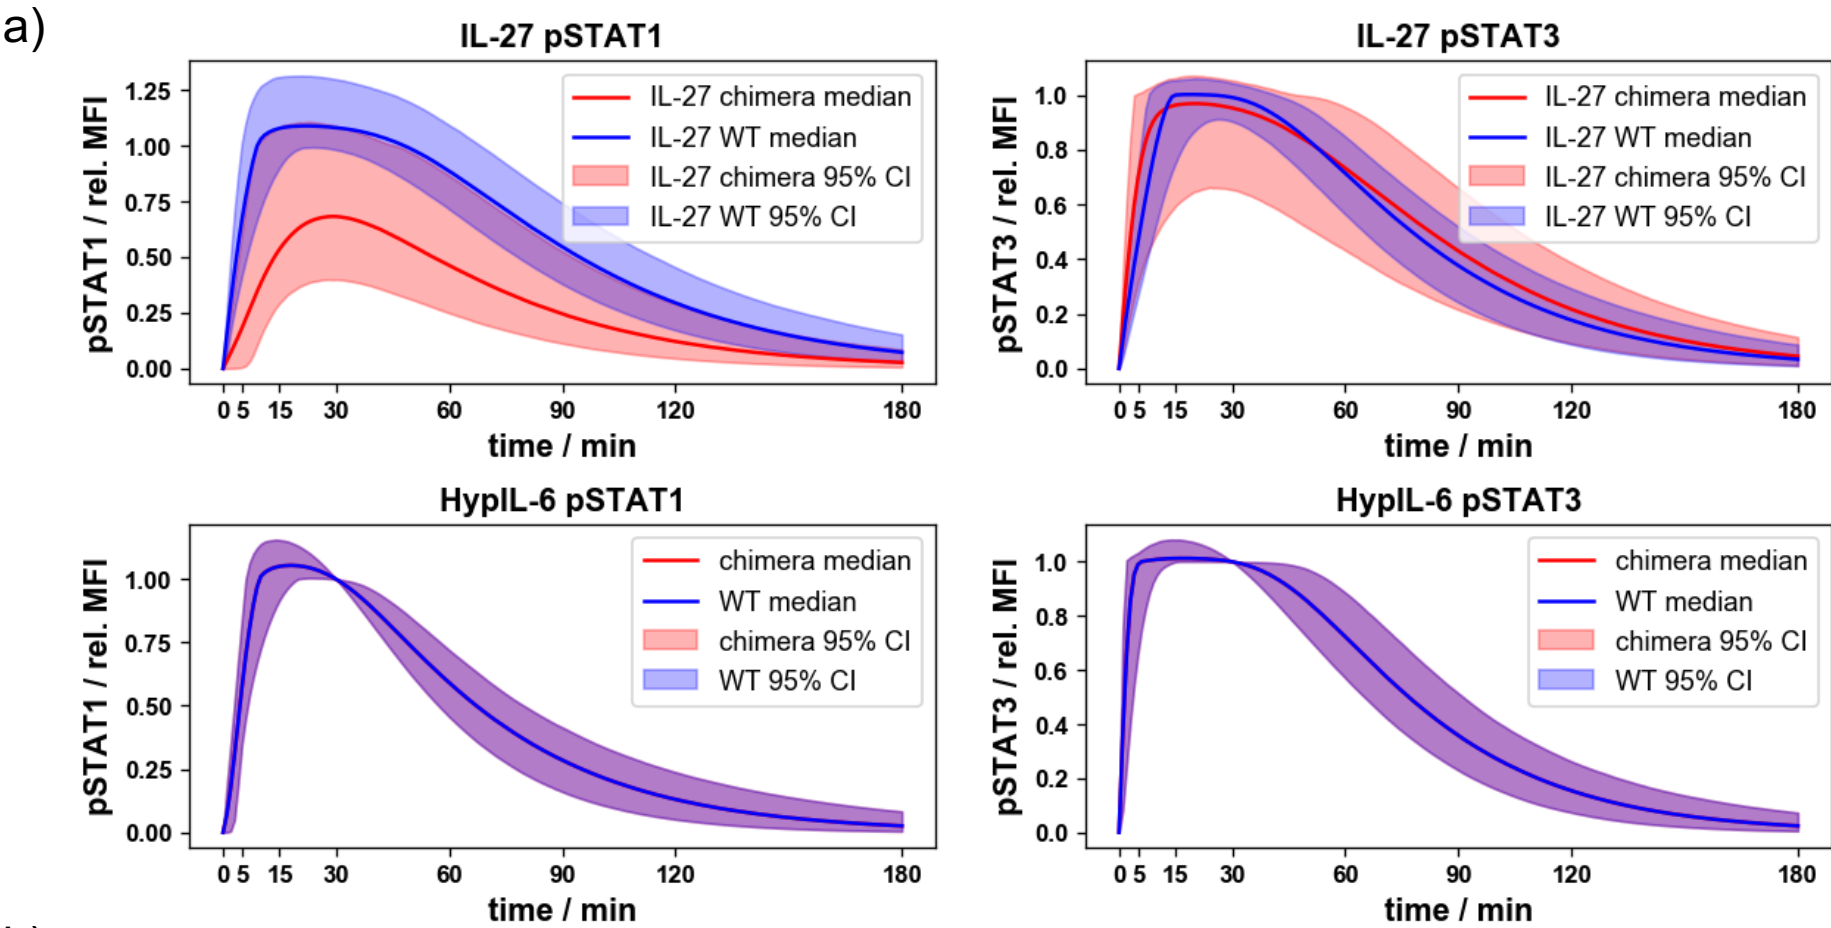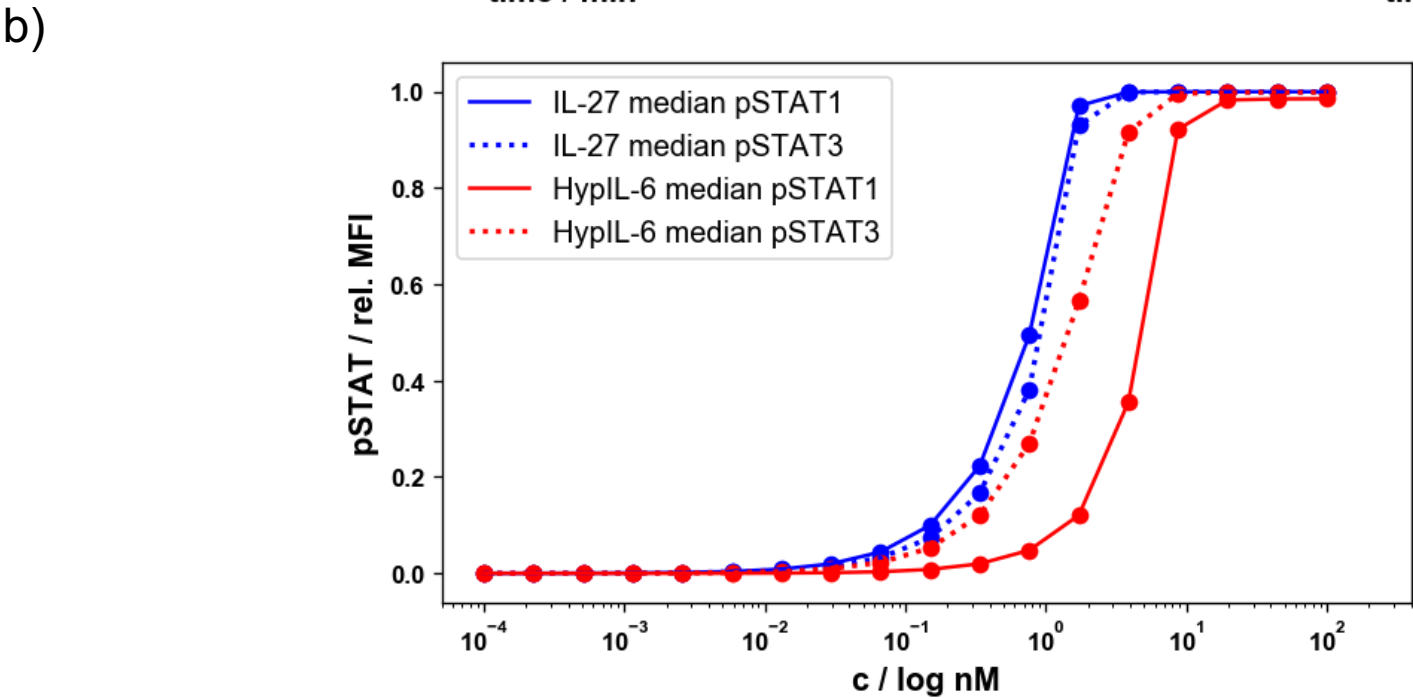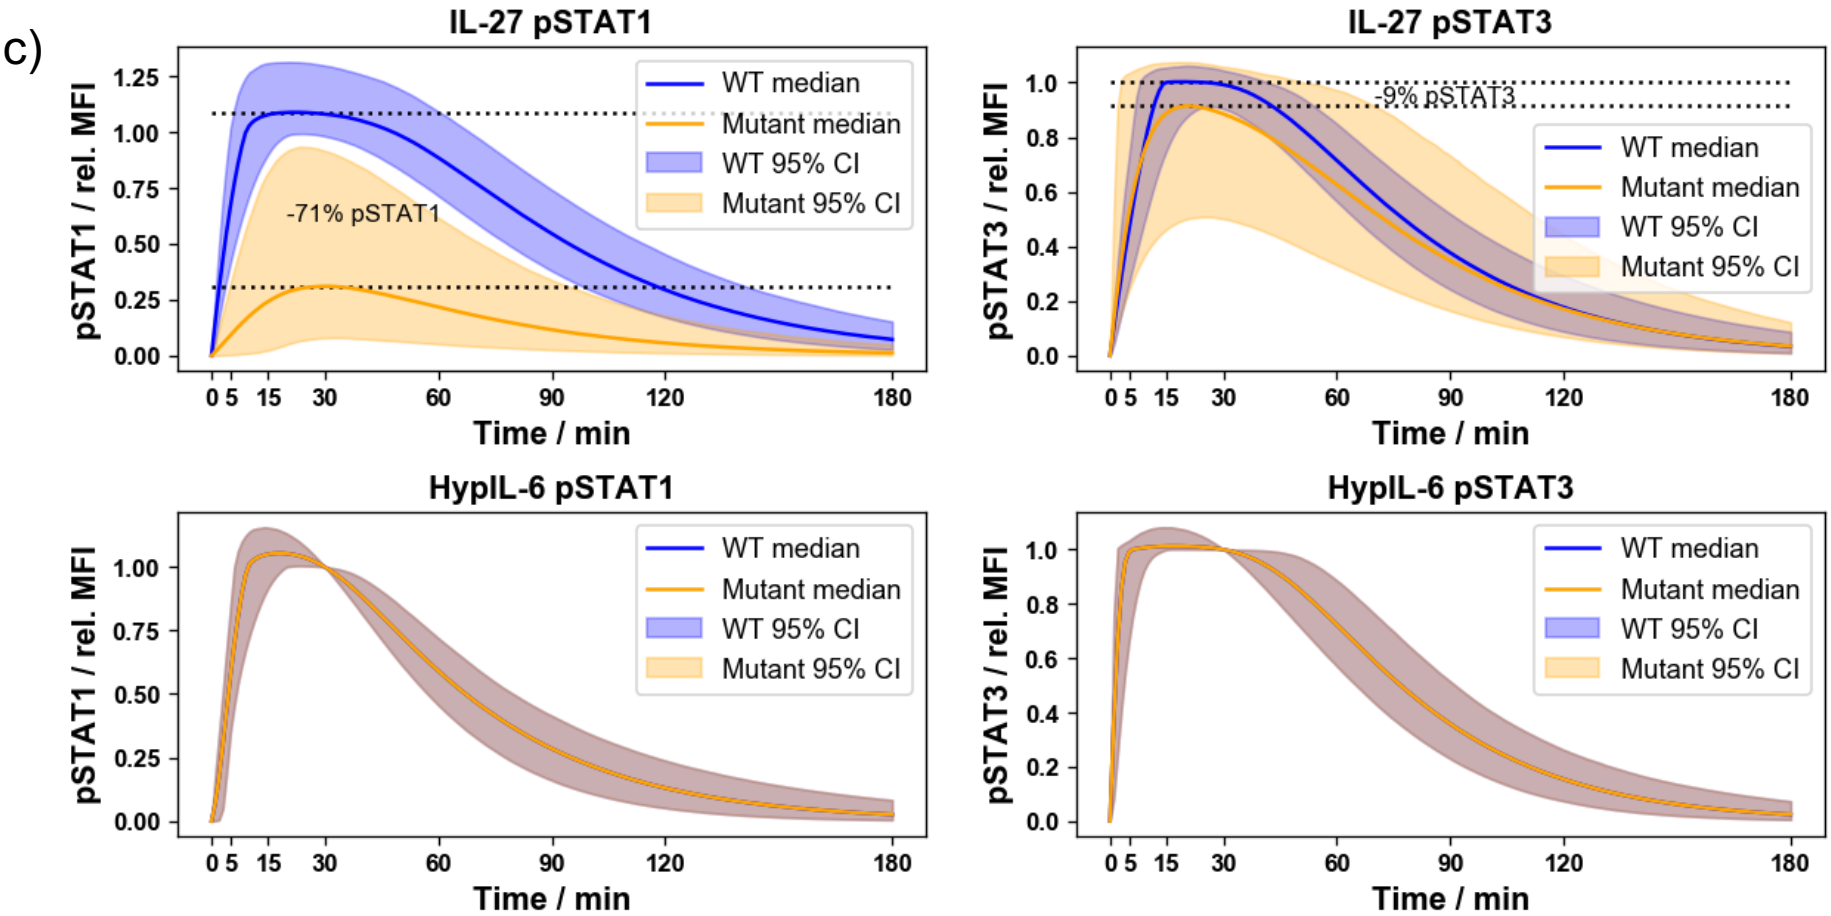

Supplement: supp [file elife-66014-supp-v1.zip]

Figure 3-figure supplement 2

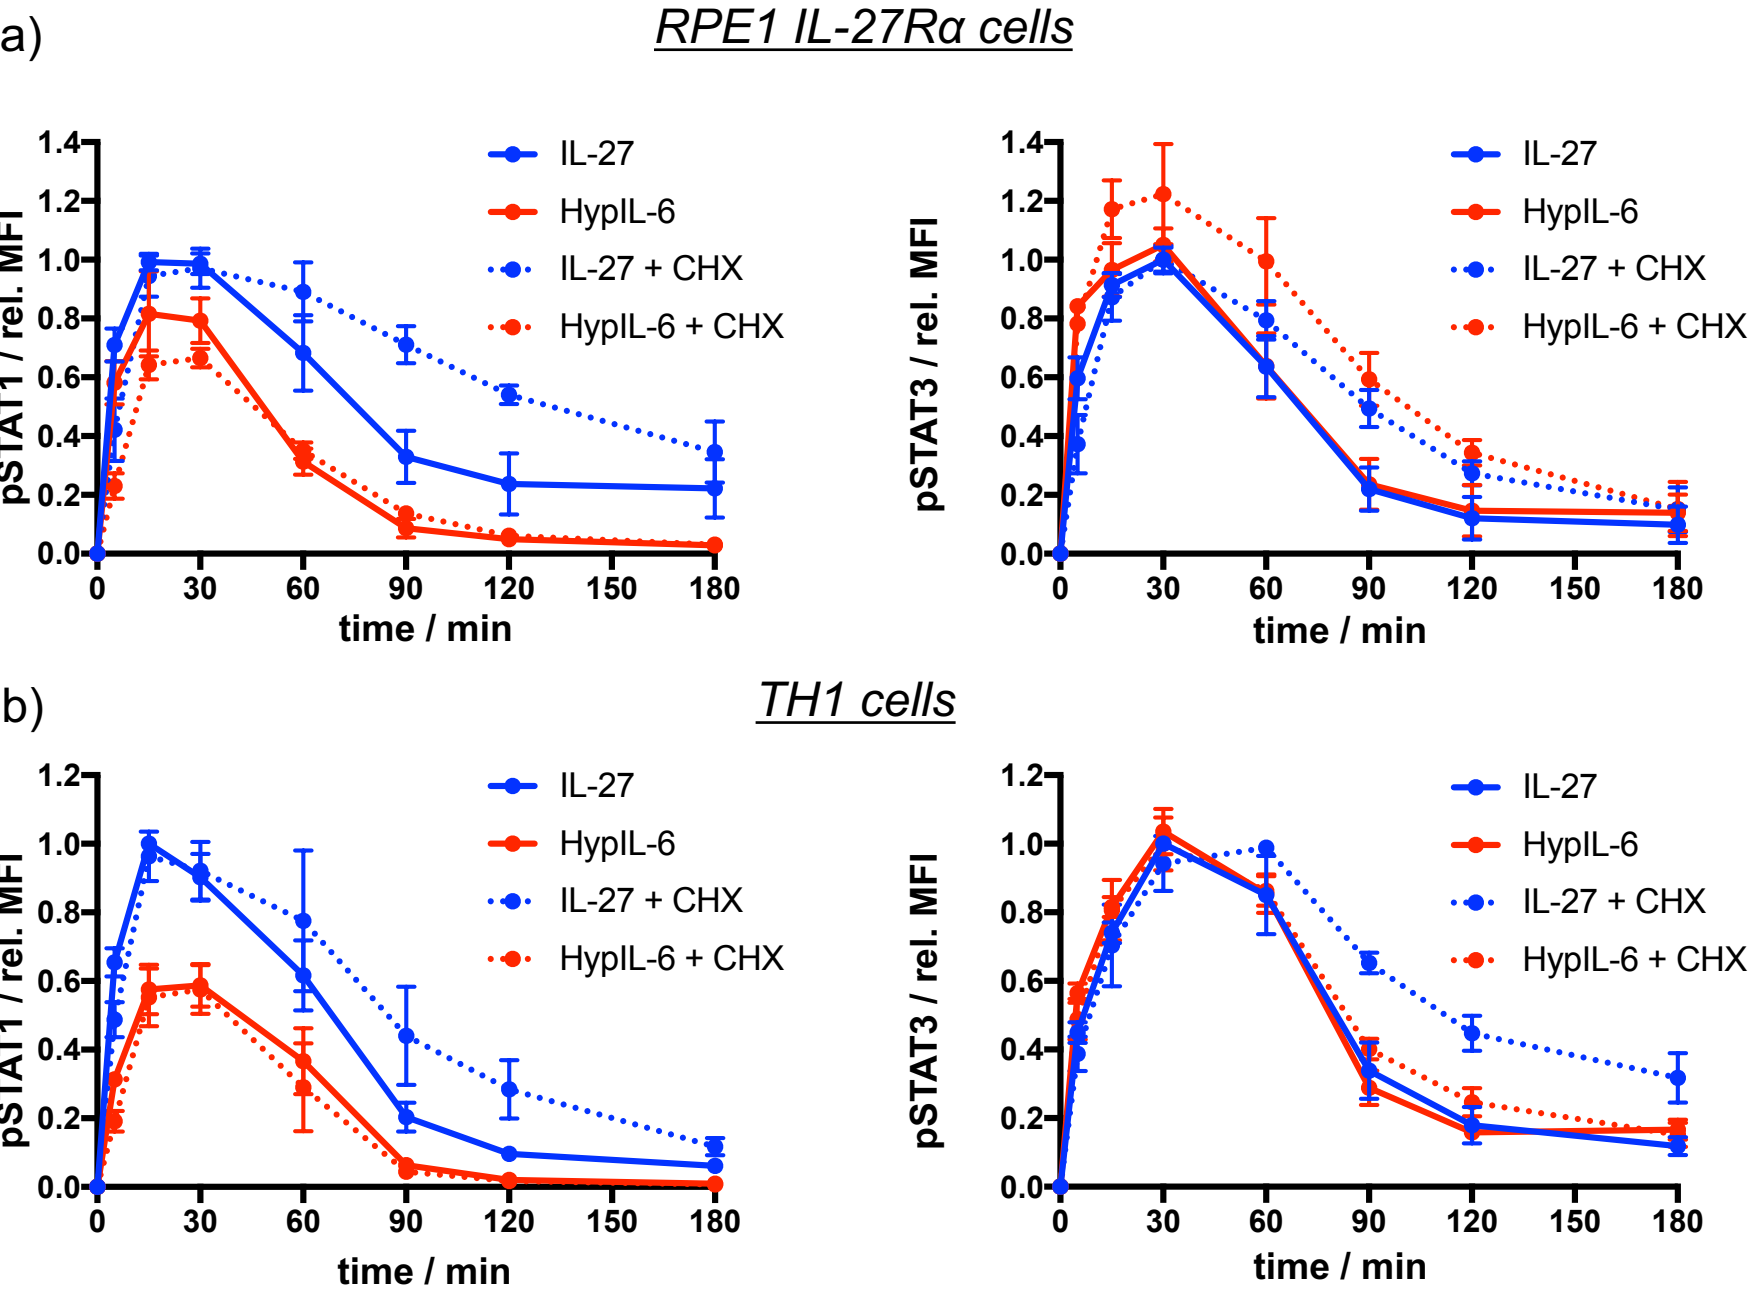

Supplement: supp [file elife-66014-supp-v1.zip]

Figure 5-figure supplement 1

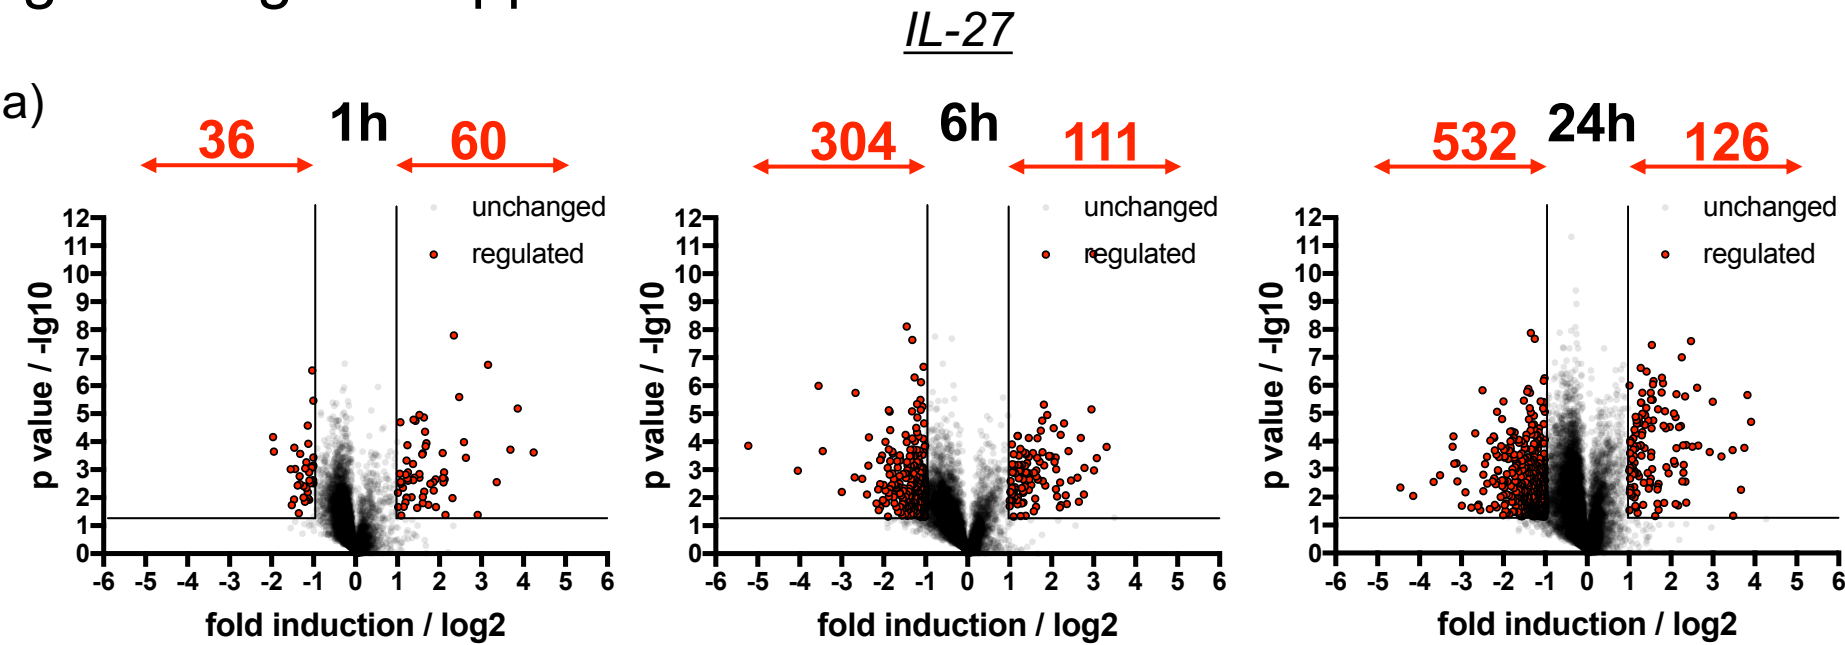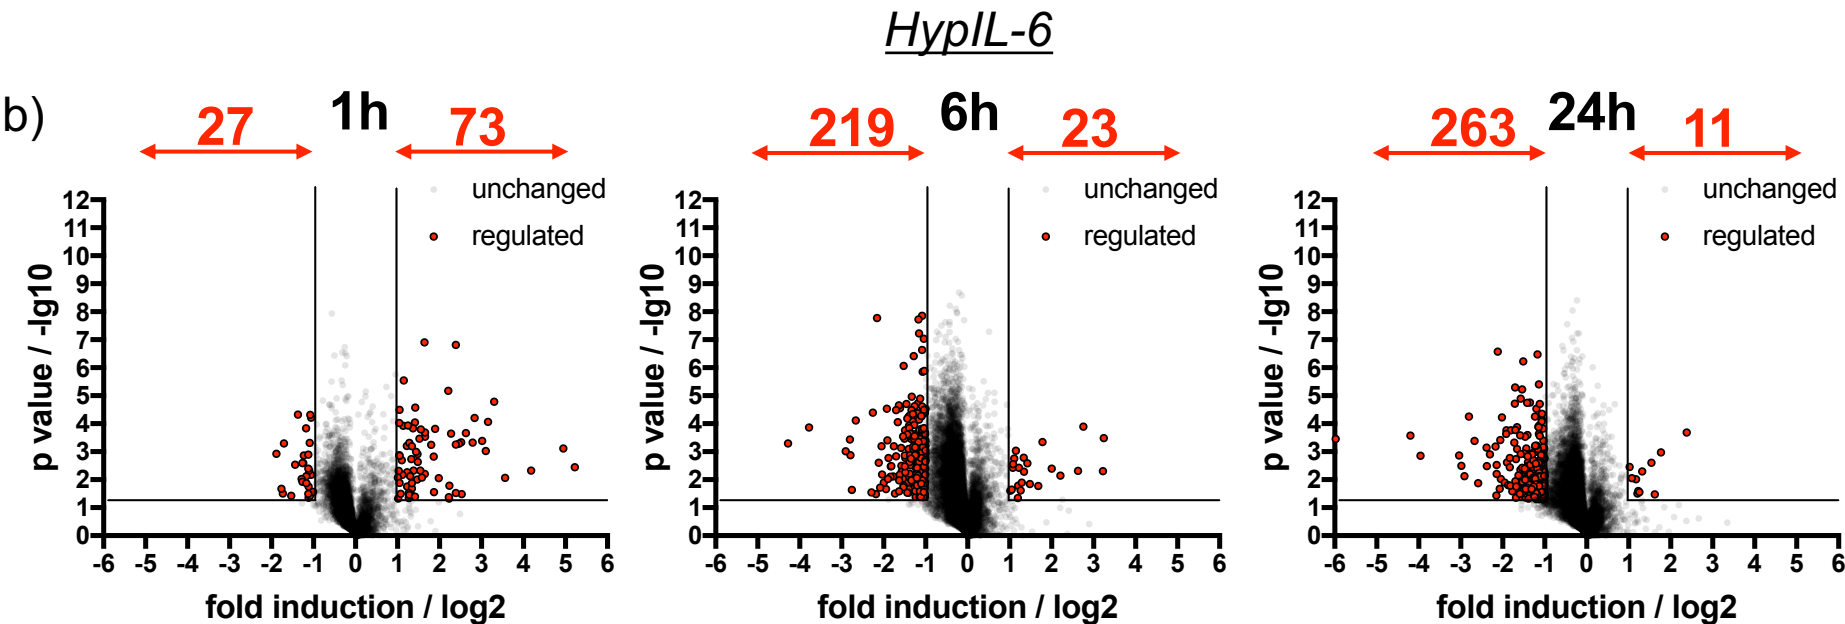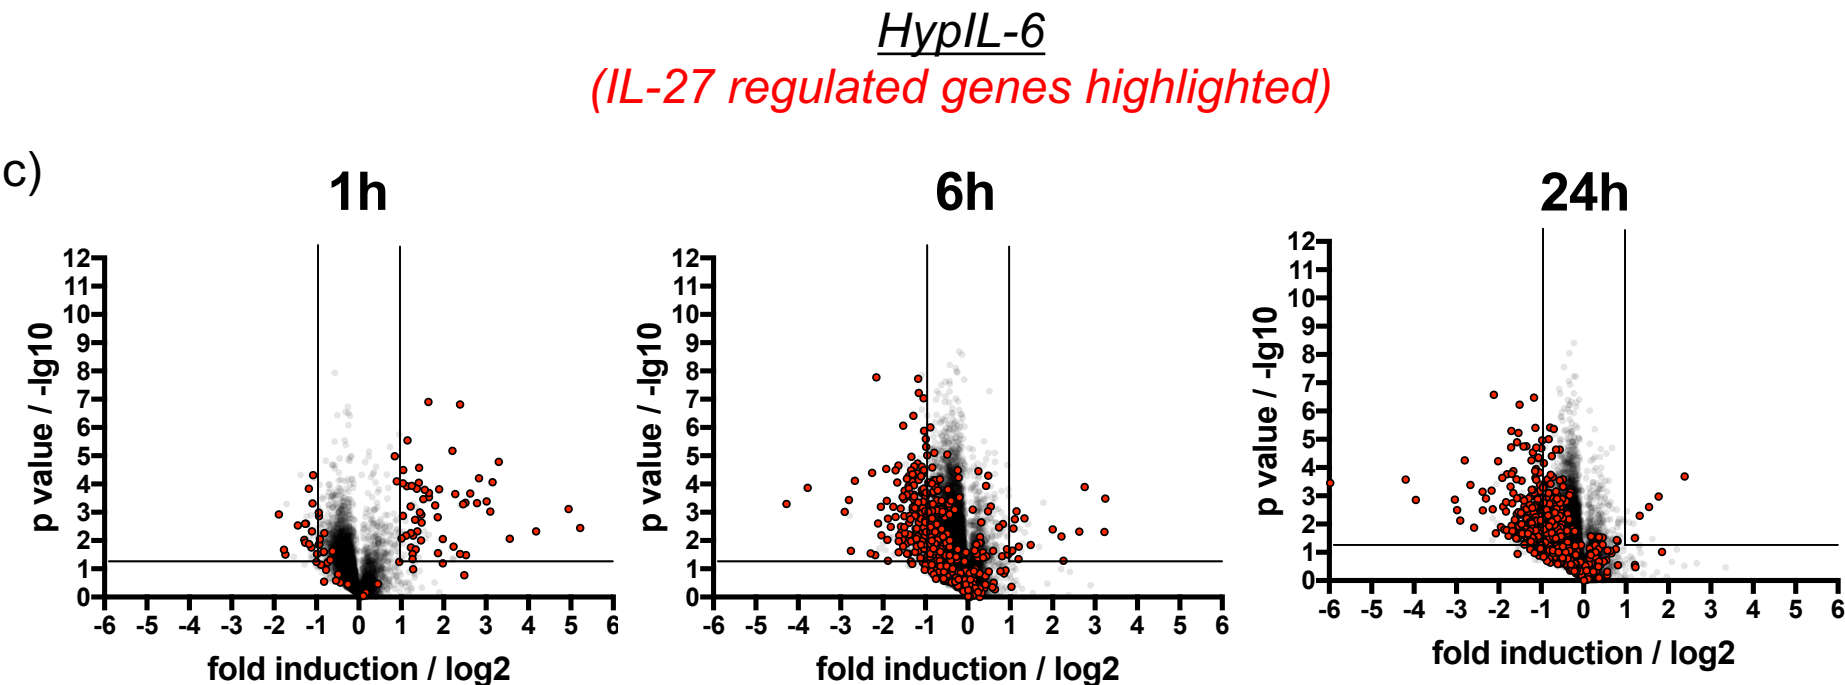

Supplement: supp [file elife-66014-supp-v1.zip]

Figure 1-figure supplement 3

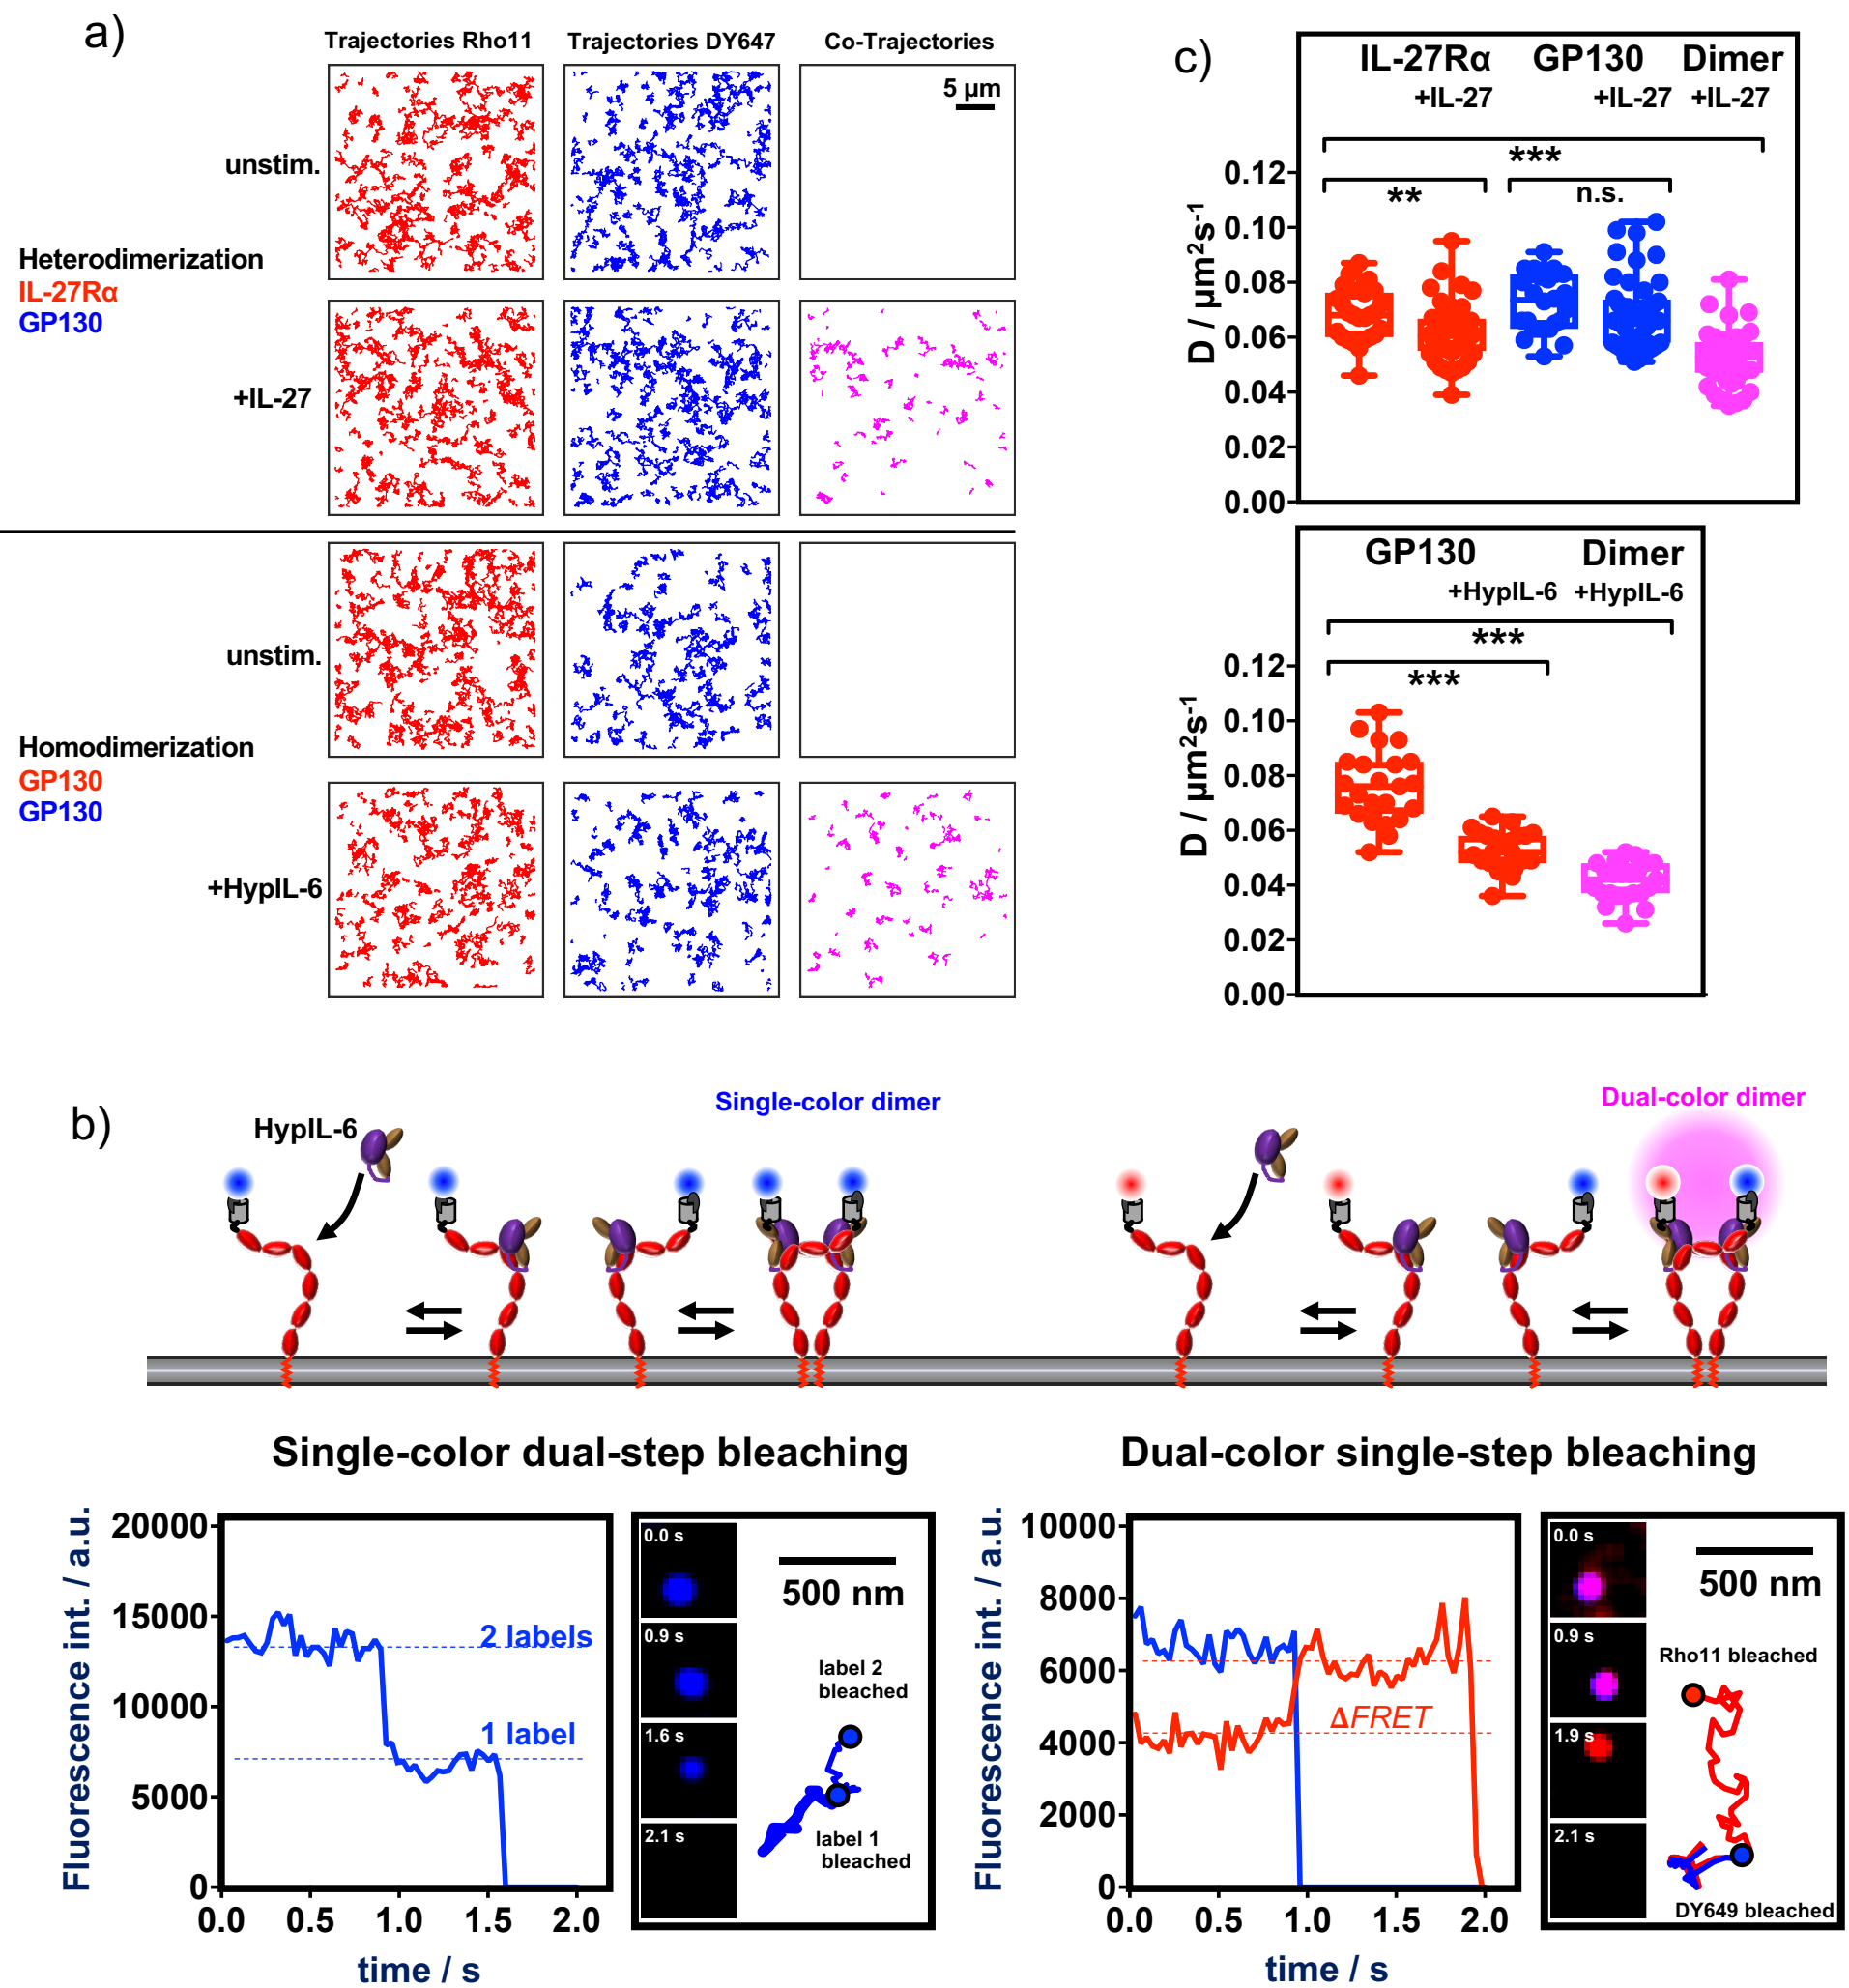

Supplement: supp [file elife-66014-supp-v1.zip]

Figure 1-figure supplement 1

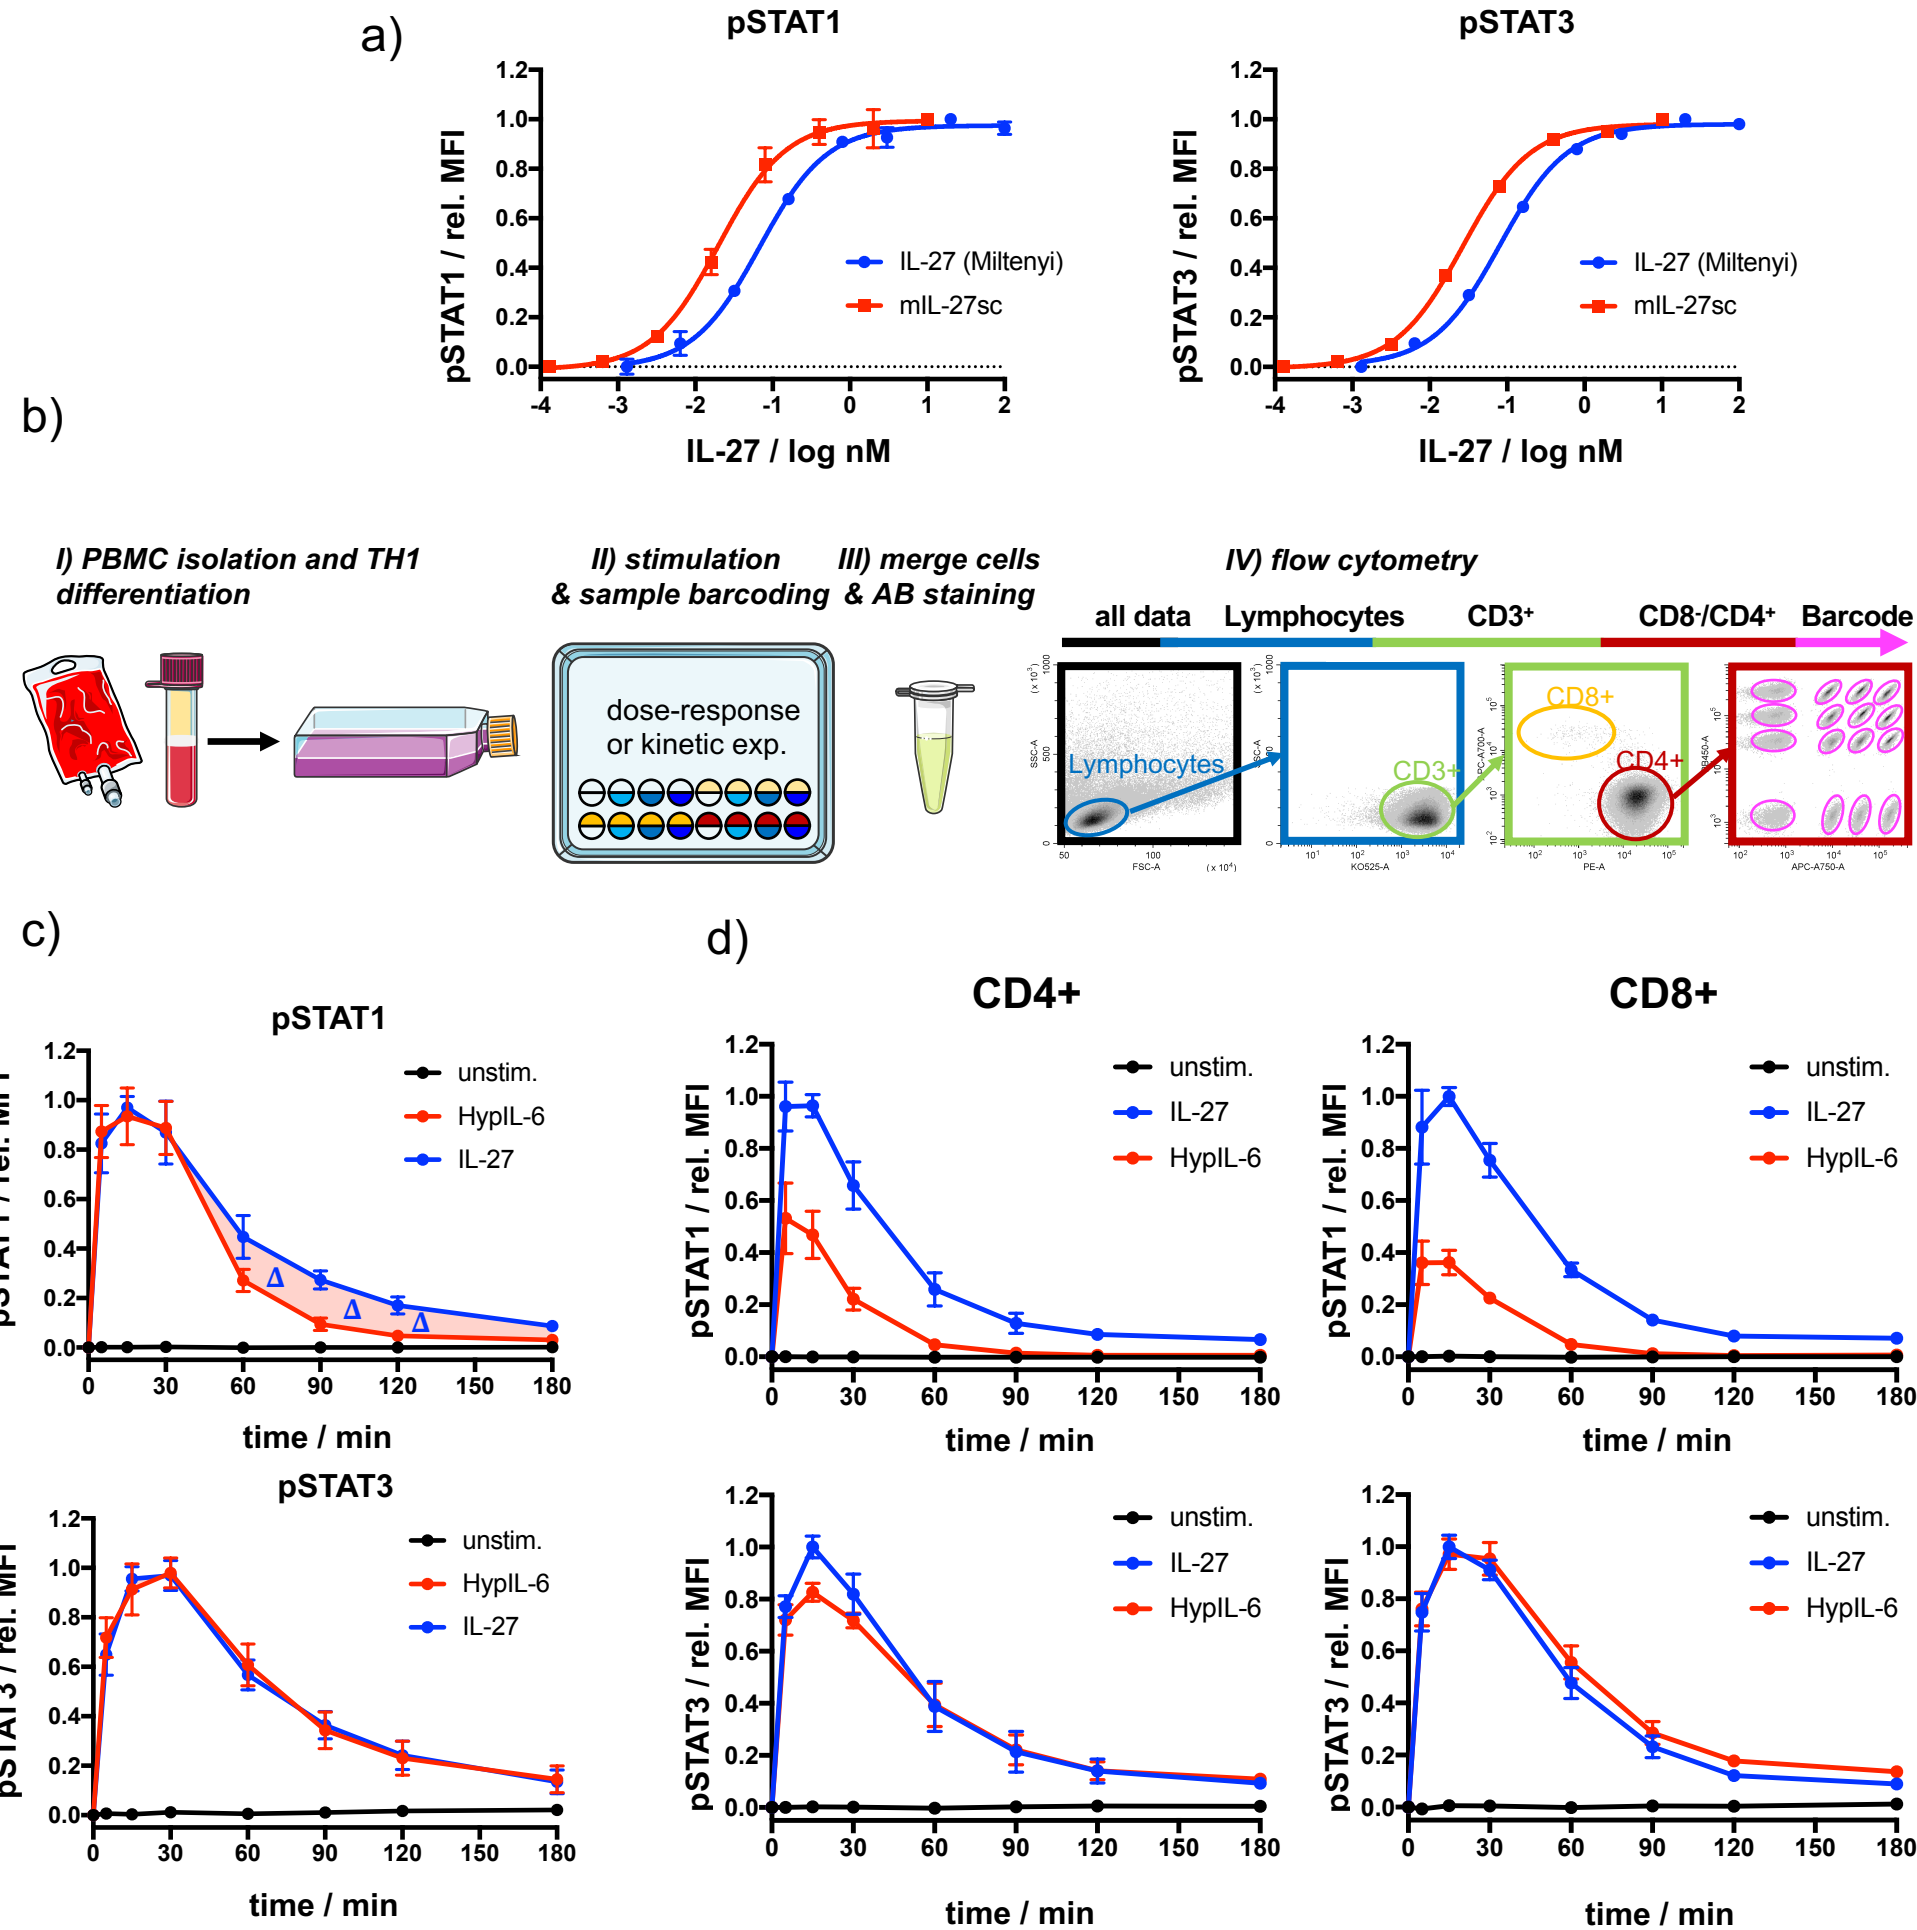

Supplement: supp [file elife-66014-supp-v1.zip]

Figure 5-figure supplement 3

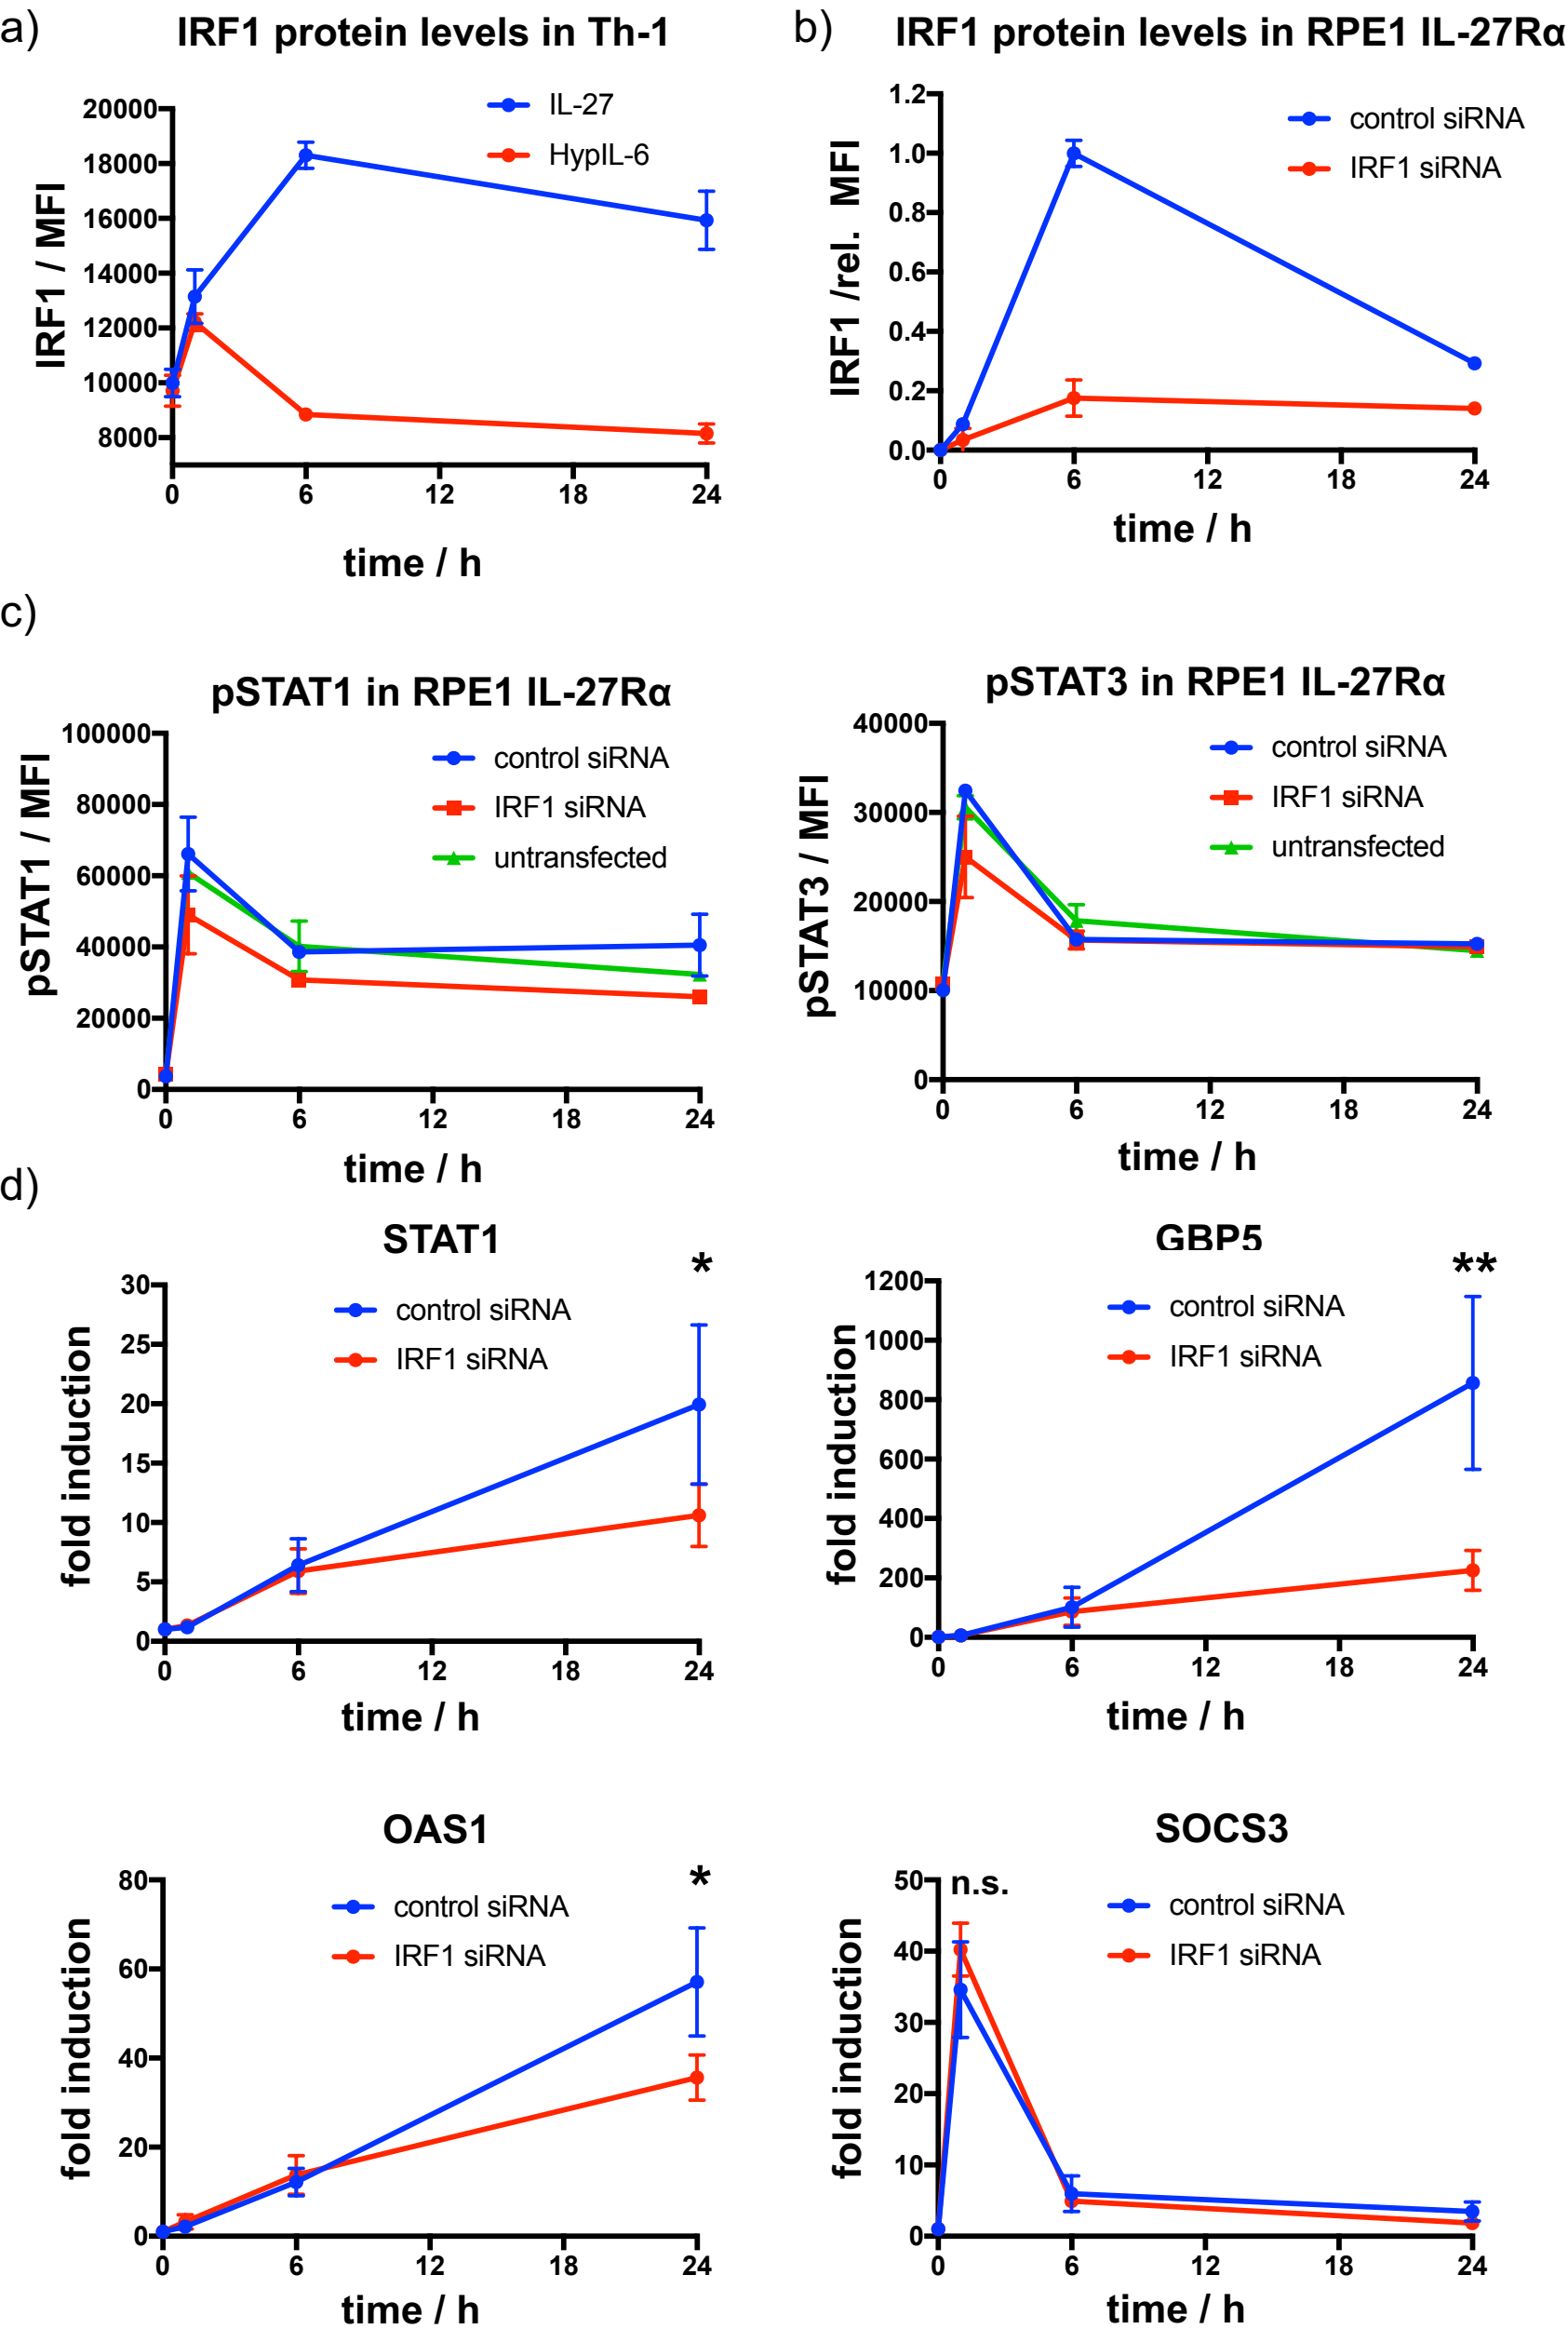

Supplement: supp [file elife-66014-supp-v1.zip]
